# Supplementary material for: Oral function in patients with myasthenia gravis
Source: PeerJ. 2021 Jun 29;9:e11680. doi: 10.7717/peerj.11680 (PMC8253106; doi:10.7717/peerj.11680)
Supplement: Supplemental Information 1 [file peerj-09-11680-s001.xlsx]

## Sheet: Sheet1
	Controls		Burst area								Kinetic 3
	ID		EMG 1 - first 5	EMG 1- last 5	EMG 2 - First 5	EMG 2 -last 5	EMG 3 - First 5	EMG 3 - last 5	EMG 4 - First 5	EMG 4 - last 5	Vertical movement - first 5	Vertical movement last 5
	CS01	Soft food 1	0.397054	0.363641	0.197666	0.158714	0.121273	0.110966	0.0917996	0.11089	0.104028	0.0991667
		Soft food 2	0.323679	0.299609	0.172847	0.1497	0.148487	0.117357	0.0878816	0.102196	0.102083	0.112083
		Soft food 3	0.306102	0.37231	0.154636	0.177869	0.149103	0.176675	0.079093	0.0900046	0.108194	0.108194
		Hard food 1	0.418352	0.321257	0.207925	0.204173	0.198637	0.182429	0.118375	0.128071	0.140417	0.0876389
		Hard food 2	0.299142	0.327196	0.155927	0.199257	0.198574	0.214118	0.0590624	0.129088	0.107222	0.10125
		Hard food 3	0.378291	0.189272	0.199081	0.113314	0.226708	0.108033	0.0848488	0.116664	0.126806	0.100833
	CS02	Soft food 1	0.34728	0.496463	0.217023	0.251426	0.302952	0.610167	0.184526	0.482243	0.110556	0.0944444
		Soft food 2	0.376095	0.436767	0.22557	0.305353	0.358008	0.547007	0.182408	0.80116	0.108056	0.0931944
		Soft food 3	0.39514	0.370619	0.199894	0.374321	0.285952	0.528588	0.152203	0.298106	0.102917	0.125278
		Hard food 1	0.484033	0.1984	0.213138	0.142757	0.426512	0.373278	0.179306	0.316827	0.124722	0.09375
		Hard food 2	0.515001	0.198421	0.205859	0.135127	0.435754	0.296162	0.148029	0.30671	0.114722	0.0894444
		Hard food 3	0.458167	0.132194	0.154034	0.131079	0.330927	0.29014	0.171155	0.146964	0.124722	0.0972222
	CS03	Soft food 1	0.314259	0.129202	0.368217	0.257904	0.265299	0.153241	0.174196	0.178701	0.0730556	0.0602431
		Soft food 2	0.401893	0.202347	0.242962	0.272145	0.259409	0.123924	0.187738	0.406904	0.0584722	0.0647569
		Soft food 3	0.255806	0.25872	0.351522	0.415437	0.23945	0.218693	0.190086	0.530527	0.0544444	0.0643056
		Hard food 1	0.247643	0.309718	0.35207	0.238855	0.251459	0.248322	0.25803	0.304597	0.0665278	0.0602778
		Hard food 2	0.226495	0.354473	0.29992	0.219493	0.2577	0.276424	0.19969	0.223758	0.0663194	0.0598611
		Hard food 3	0.244337	0.123752	0.357318	0.306757	0.274255	0.219468	0.167546	0.219468	0.0608333	0.0518056
	CS04	Soft food 1	0.181796	0.138778	0.178235	0.210774	0.135158	0.0951674	0.0447076	0.0592562	0.0555556	0.0454861
		Soft food 2	0.182132	0.107581	0.198124	0.295456	0.229518	0.16724	0.0720098	0.0526302	0.0606944	0.0597222
		Soft food 3	0.0893002	0.117711	0.163337	0.283402	0.145141	0.144056	0.0659606	0.0660674	0.0548611	0.0545139
		Hard food 1	0.213881	0.093885	0.216273	0.163582	0.252185	0.0729118	0.117669	0.0706838	0.065	0.12
		Hard food 2	0.227656	0.129097	0.234206	0.176254	0.174752	0.104514	0.11258	0.0951916	0.0683333	0.0458333
		Hard food 3	0.226755	0.228981	0.164795	0.623898	0.26008	0.328297	0.12752	0.189951	0.0584722	0.0444444
	CS52	Soft food 2	0.160003	0.160003	0.125528	0.125528	0.40315	0.40315	0.100187	0.100187	0.0791667	0.0791667
		Soft food 3	0.170383	0.165368	0.133127	0.129711	0.384546	0.3793	0.0890164	0.0926516	0.210833	0.195278
		Hard food 1	0.221328	0.204268	0.161311	0.141713	0.451446	0.411605	0.0986254	0.0904542	0.0879167	0.085
		Hard food 2	0.223762	0.161742	0.151002	1.53405	0.417618	0.328468	0.103859	0.0989268	0.199028	0.220972
		Hard food 3	0.193463	0.173852	0.149227	0.128955	0.401055	0.363319	0.129473	0.103203	0.0952778	0.0718056
	CS53	Soft food 1	0.188821	0.193088	0.223174	0.173864	0.114182	0.151075	0.129765	0.231395	0.0472222	0.07
		Soft food 2	0.254688	0.19102	0.252389	0.158475	0.188181	0.192688	0.124322	0.353175	0.0659722	0.0675
		Soft food 3	0.205898	0.209856	0.233233	0.194518	0.150117	0.135938	0.128848	0.259413	0.0633681	0.0581944
		Hard food 1	0.277581	0.150707	0.267693	0.139189	0.246178	0.153909	0.159405	0.125413	0.0927778	0.0693056
		Hard food 2	0.266733	0.144023	0.225492	0.15012	0.234281	0.0956992	0.115902	0.155998	0.0844444	0.0697917
		Hard food 3	0.21928	0.150207	0.209264	0.105502	0.206494	0.111876	0.120675	0.113897	0.0761111	0.0613889
	CS54	Soft food 1	0.175358	0.196721	0.223461	0.250656	0.370164	0.419423	0.42353	0.541328	0.0659722	0.0727778
		Soft food 2	0.245292	0.242381	0.103656	0.108029	0.339041	0.316683	0.364675	0.354539	0.0718056	0.0695833
		Soft food 3	0.177293	0.169402	0.179834	0.20762	0.347119	3.12014	0.411373	0.49552	0.0723611	0.0727778
		Hard food 1	0.294216	0.173159	0.138973	0.199366	0.412421	0.354574	0.342955	0.362828	0.0766667	0.0619444
		Hard food 2	0.315934	0.232162	0.126353	0.119062	0.47479	0.23926	0.307995	0.459985	0.0794444	0.0572222
		Hard food 3	0.280294	0.179654	0.113914	0.172951	0.362433	0.270079	0.245593	0.350595	0.0730556	0.0572222
	CS55	Soft food 1	0.161487	0.126451	0.161182	0.163164	0.372734	0.355235	0.160807	0.20274	0.06375	0.0651042
		Soft food 2	0.200316	0.146149	0.209031	0.196148	0.495703	0.392229	0.22372	0.213047	0.0595833	0.0594444
		Soft food 3	0.200316	0.146149	0.209031	0.196148	0.495703	0.392229	0.22372	0.213047	0.0595833	0.0594444
		Hard food 1	0.273814	0.132458	0.276877	0.178174	0.523868	0.282974	0.260964	1.15346	0.0534722	0.059375
		Hard food 2	0.27443	0.176849	0.318352	0.205115	0.577916	0.270291	0.275534	0.329242	0.0576389	0.0740741
		Hard food 3	0.29639	0.179385	0.326478	0.196771	0.578353	0.34297	0.350284	0.253206	0.0691667	0.0516667
	CS56	Soft food 1	0.227218	0.33341	0.227014	0.235166	0.258992	0.270445	0.232156	0.292371	0.0956944	0.0893056
		Soft food 2	0.235827	0.367135	0.222315	0.229356	0.267732	0.258063	0.19983	0.366545	0.0920833	0.0973611
		Soft food 3	0.197149	0.359847	0.203041	0.225682	0.186152	0.242794	0.265321	0.308463	0.141806	0.0927778
		Hard food 1	0.23692	0.10047	0.266878	0.234468	0.232789	0.195322	0.192146	0.231276	0.0970833	0.0827778
		Hard food 2	0.521783	0.406959	0.285551	0.219156	0.400425	0.350918	0.209201	0.26926	0.127639	0.115972
		Hard food 3	0.517737	0.165399	0.26339	0.125272	0.355394	0.146643	0.20194	0.208881	0.0955556	0.0784722

## Sheet: CS01
CS01	Soft food 1	EMG 1	EMG2	EMG 3	EMG 4	Kin3			EMG 1	EMG2	EMG 3	EMG 4	Kin3			EMG 1	EMG2	EMG 3	EMG 4	Kin3
	First 5							Soft food 2							Soft food 3
		0.3977	0.171043	0.128731	0.093045	0.1125		First 5	0.280028	0.146323	0.118726	0.099314	0.125694		First 5	0.335158	0.188346	0.09259	0.078196	0.118056
		0.397277	0.175281	0.097874	0.082747	0.09375			0.342395	0.158942	0.183746	0.079084	0.0993056			0.217807	0.099592	0.138885	0.061423	0.104861
		0.388217	0.230592	0.121956	0.09163	0.107639			0.345115	0.206981	0.084366	0.091711	0.0979167			0.379957	0.196303	0.207168	0.092784	0.105556
		0.422686	0.209719	0.131057	0.099589	0.0916667			0.283601	0.157678	0.142927	0.080962	0.0986111			0.330298	0.122836	0.169573	0.086918	0.113889
		0.379392	0.201696	0.126745	0.091987	0.114583			0.367254	0.194313	0.212668	0.088337	0.0888889			0.26729	0.166102	0.137297	0.076144	0.0986111
	Average	0.397054	0.197666	0.121273	0.0917996	0.104028		Average	0.323679	0.172847	0.148487	0.0878816	0.102083		Average	0.306102	0.154636	0.149103	0.079093	0.108194
	Last 5	0.476496	0.176586	0.168485	0.113945	0.107639		Last 5	0.288753	0.175664	0.082214	0.10221	0.122222		Last 5	0.311977	0.128872	0.160257	0.075963	0.118056
		0.313621	0.168639	0.110242	0.089638	0.0930556			0.265748	0.097952	0.109025	0.097165	0.11875			0.349002	0.137348	0.154937	0.068402	0.0993056
		0.384578	0.140098	0.090032	0.095663	0.111806			0.282907	0.131688	0.08099	0.099313	0.117361			0.346411	0.178448	0.14128	0.069136	0.0840278
		0.333583	0.159297	0.098391	0.103368	0.0791667			0.264434	0.157792	0.151127	0.084301	0.102778			0.298522	0.165484	0.182614	0.08742	0.125
		0.309926	0.148951	0.087681	0.151835	0.104167			0.396202	0.185405	0.163427	0.127993	0.0993056			0.555637	0.279195	0.244289	0.149102	0.114583
	Average	0.363641	0.158714	0.110966	0.11089	0.0991667		Average	0.299609	0.1497	0.117357	0.102196	0.112083		Average	0.37231	0.177869	0.176675	0.0900046	0.108194
	Hard food 1	EMG 1	EMG2	EMG 3	EMG 4	Kin3			EMG 1	EMG2	EMG 3	EMG 4	Kin3			EMG 1	EMG2	EMG 3	EMG 4	Kin3
								Hard food 2							Hard food 3
	First 5	0.480647	0.236318	0.173058	0.148632	0.147222		First 5	0.328548	0.169298	0.259691	0.057013	0.1		First 5	0.481017	0.251231	0.320978	0.105034	0.151389
		0.29894	0.163122	0.153202	0.093909	0.14375			0.304552	0.12953	0.153047	0.07532	0.121528			0.376831	0.181065	0.227636	0.092091	0.113889
		0.497469	0.225543	0.22479	0.175007	0.148611			0.179599	0.111432	0.151232	0.048807	0.0902778			0.316535	0.188696	0.197063	0.074876	0.132639
		0.46606	0.206642	0.24588	0.090651	0.13125			0.32022	0.173005	0.174235	0.063213	0.120139			0.38152	0.19535	0.199024	0.063782	0.111111
		0.348644	0.208001	0.196254	0.083674	0.13125			0.362789	0.196371	0.254663	0.050959	0.104167			0.335552	0.179061	0.188839	0.088461	0.125
	Average	0.418352	0.207925	0.198637	0.118375	0.140417		Average	0.299142	0.155927	0.198574	0.0590624	0.107222		Average	0.378291	0.199081	0.226708	0.0848488	0.126806
	Last 5	0.194806	0.117505	0.113629	0.064523	0.0881944		Last 5	0.22145	0.120804	0.125054	0.07818	0.10625		Last 5	0.09909	0.06616	0.079787	0.090179	0.0958333
		0.278473	0.15845	0.130548	0.194231	0.0736111			0.174585	0.112673	0.11749	0.040409	0.0923611			0.073835	0.060424	0.063938	0.181625	0.144444
		0.563538	0.41655	0.306165	0.150728	0.101389			0.26264	0.167491	0.19819	0.157038	0.127778			0.394071	0.245036	0.171379	0.171684	0.0958333
		0.407853	0.262403	0.276012	0.201617	0.0673611			0.169441	0.085245	0.094169	0.057333	0.0854167			0.229942	0.119706	0.129943	0.076233	0.0638889
		0.161617	0.065956	0.085792	0.029254	0.107639			0.807866	0.510073	0.535685	0.31248	0.0944444			0.149423	0.075242	0.09512	0.0636	0.104167
	Average	0.321257	0.204173	0.182429	0.128071	0.0876389		Average	0.327196	0.199257	0.214118	0.129088	0.10125		Average	0.189272	0.113314	0.108033	0.116664	0.100833

## Sheet: CS02
CS02		EMG 1		EMG2		EMG 3		EMG 4		Kin3			EMG 1		EMG2		EMG 3		EMG 4		Kin3			EMG 1		EMG2		EMG 3		EMG 4		Kin3
	Soft food 1											Soft food 2											Soft food 3
	First 5	0.148362		0.142263		0.147132		0.181367		0.0847222		First 5	0.40186		0.220921		0.311258		0.145347		0.120139		First 5	0.348187		0.191894		0.177344		0.130626		0.106944
		0.44667		0.249486		0.314388		0.22487		0.135417			0.312201		0.236523		0.340036		0.165416		0.0881944			0.330369		0.135196		0.30312		0.140177		0.10625
		0.410229		0.223866		0.364071		0.163862		0.126389			0.304913		0.157571		0.406696		0.216854		0.0854167			0.350643		0.197		0.324897		0.149813		0.0743056
		0.356946		0.268054		0.371631		0.198979		0.0972222			0.421822		0.269083		0.395022		0.175506		0.120139			0.474252		0.218651		0.28077		0.156858		0.113889
		0.374192		0.201447		0.31754		0.153554		0.109028			0.43968		0.243752		0.337026		0.208916		0.126389			0.47225		0.256727		0.343627		0.183542		0.113194
	Average	0.34728		0.217023		0.302952		0.184526		0.110556		Average	0.376095		0.22557		0.358008		0.182408		0.108056		Average	0.39514		0.199894		0.285952		0.152203		0.102917
	Last 5	0.057914		0.043039		0.059468		0.140646		0.111806		Last 5	0.042502		0.038499		0.055009		0.126266		0.0916667		Last 5	0.188753		0.256743		0.487501		0.24978		0.127778
		0.320445		0.158056		0.326595		0.205843		0.0875			0.203535		0.121248		0.344285		0.399161		0.0972222			0.437482		0.175692		0.556989		0.255166		0.0916667
		0.278196		0.175024		0.460331		0.193753		0.0743056			0.344903		0.229838		0.542154		0.800871		0.108333			0.42085		0.243045		0.439702		0.287782		0.127778
		1.111		0.495583		1.28074		1.26157		0.0875			1.22135		0.900643		0.59721		1.80389		0.0763889			0.53634		0.256358		0.579973		0.315239		0.131944
		0.714757		0.385428		0.923702		0.609407		0.111111			0.371542		0.236539		1.19638		0.875614		0.0923611			0.269669		0.939765		0.578773		0.382561		0.147222
	Average	0.496463		0.251426		0.610167		0.482243		0.0944444		Average	0.436767		0.305353		0.547007		0.80116		0.0931944		Average	0.370619		0.374321		0.528588		0.298106		0.125278
		EMG 1		EMG2		EMG 3		EMG 4		Kin3			EMG 1		EMG2		EMG 3		EMG 4		Kin3			EMG 1		EMG2		EMG 3		EMG 4		Kin3
	Hard food 1											Hard food 2											Hard food 3
	First 5	0.658133		0.316699		0.517961		0.171502		0.117361		First 5	0.619052		0.28805		0.582536		0.159383		0.104861		First 5	0.48444		0.175381		0.344818		0.176283		0.125
		0.430655		0.167796		0.35772		0.165814		0.117361			0.576149		0.21823		0.372849		0.152767		0.1125			0.413179		0.141099		0.315807		0.147981		0.114583
		0.570638		0.323126		0.594957		0.23177		0.143056			0.441059		0.236038		0.494784		0.170134		0.113194			0.561042		0.223067		0.416039		0.253373		0.145833
		0.401592		0.146742		0.348654		0.127372		0.127083			0.547825		0.170571		0.419804		0.123881		0.116667			0.287789		0.087659		0.293081		0.121442		0.10625
		0.359147		0.111325		0.313267		0.200071		0.11875			0.390922		0.116407		0.308796		0.133979		0.126389			0.544387		0.142966		0.284892		0.156698		0.131944
	Average	0.484033		0.213138		0.426512		0.179306		0.124722		Average	0.515001		0.205859		0.435754		0.148029		0.114722		Average	0.458167		0.154034		0.330927		0.171155		0.124722
	Last 5	0.086145		0.157298		0.334575		0.126212		0.0854167		Last 5	0.201748		0.092219		0.289452		0.131404		0.104167		Last 5	0.104251		0.16552		0.339904		0.137878		0.0756944
		0.224241		0.165096		0.454193		0.176275		0.0902778			0.145757		0.142518		0.301433		0.163272		0.0909722			0.126577		0.229822		0.270033		0.205037		0.0972222
		0.187923		0.113993		0.385247		0.197548		0.102083			0.140917		0.133486		0.362053		0.174499		0.0965278			0.084282		0.098632		0.205947		0.126943		0.0993056
		0.289142		0.150525		0.300274		0.570492		0.0861111			0.085961		0.093845		0.253546		0.163003		0.0868056			0.138545		0.070759		0.298064		0.131036		0.1125
		0.20455		0.126871		0.392103		0.513607		0.104861			0.41772		0.213569		0.274328		0.901374		0.06875			0.207316		0.09066		0.33675		0.133924		0.101389
	Average	0.1984		0.142757		0.373278		0.316827		0.09375		Average	0.198421		0.135127		0.296162		0.30671		0.0894444		Average	0.132194		0.131079		0.29014		0.146964		0.0972222

## Sheet: CS03
CS03		EMG 1		EMG2		EMG 3		EMG 4		Kin3			EMG 1		EMG2		EMG 3		EMG 4		Kin3			EMG 1		EMG2		EMG 3		EMG 4		Kin3
	Soft food 1											Soft food 2											Soft food 3
	First 5	0.59637		0.559965		0.373212		0.348988		0.0861111		First 5	0.446297		0.32177		0.267083		0.211613		0.0506944		First 5	0.286994		0.396284		0.260529		0.178956		0.0486111
		0.317801		0.338996		0.22871		0.121457		0.0673611			0.342101		0.187683		0.301401		0.146526		0.05			0.308455		0.351256		0.190295		0.173853		0.0451389
		0.227834		0.317202		0.252817		0.1098		0.0569444			0.564642		0.328587		0.3193		0.191287		0.0708333			0.282681		0.362735		0.282978		0.232343		0.0534722
		0.198869		0.285003		0.212407		0.121672		0.0756944			0.470095		0.240935		0.276858		0.176152		0.0618056			0.218135		0.327509		0.216001		0.167247		0.0597222
		0.23042		0.339919		0.25935		0.169061		0.0791667			0.186329		0.135836		0.132401		0.213112		0.0590278			0.182766		0.319826		0.247447		0.19803		0.0652778
	Average	0.314259		0.368217		0.265299		0.174196		0.0730556		Average	0.401893		0.242962		0.259409		0.187738		0.0584722		Average	0.255806		0.351522		0.23945		0.190086		0.0544444
	Last 5	0.155599		0.305339		0.22688		0.174277		0.0611111		Last 5	0.2349		0.26434		0.124859		0.625616		0.0743056		Last 5	0.155378		0.37983		0.256602		0.274806		0.0638889
		0.135203		0.281431		0.177784		0.201436		0.0631944			0.216075		0.385192		0.210122		0.330268		0.0631944			0.150139		0.37314		0.31866		0.258546		0.0576389
		0.098918		0.325964		0.187385		0.139908		0.0597222			0.166957		0.225194		0.077518		0.35431		0.05625			0.163335		0.249946		0.100221		0.671058		0.0756944
		0.131206		0.213746		0.124463		0.1301		00,51,00			0.272044		0.341062		0.143878		0.53183		0.0652778			0.217709		0.298748		0.113022		0.498325		0.0666667
		0.125086		0.16304		0.049693		0.247784		0.0569444			0.121758		0.144938		0.063243		0.192498		00,42,00			0.607041		0.775519		0.30496		0.949899		0.0576389
	Average	0.129202		0.257904		0.153241		0.178701		0.0602431		Average	0.202347		0.272145		0.123924		0.406904		0.0647569		Average	0.25872		0.415437		0.218693		0.530527		0.0643056
		EMG 1		EMG2		EMG 3		EMG 4		Kin3			EMG 1		EMG2		EMG 3		EMG 4		Kin3			EMG 1		EMG2		EMG 3		EMG 4		Kin3
	Hard food 1											Hard food 2											Hard food 3
	First 5	0.299075		0.431154		0.297936		0.199464		0.0631944		First 5	0.144727		0.254279		0.235656		0.170676		00,59,00		First 5	0.275881		0.447471		0.289698		0.120651		0.0472222
		0.230955		0.398589		0.305956		0.3271		0.0715278			0.148127		0.195193		0.160383		0.132845		0.0451389			0.235118		0.39454		0.303751		0.223662		0.0694444
		0.271958		0.380459		0.253563		0.222696		0.0743056			0.307807		0.37594		0.329416		0.250745		0.0826389			0.193055		0.258155		0.202046		0.138494		0.0527778
		0.207463		0.293142		0.186339		0.269223		0.0465278			0.28091		0.316968		0.271314		0.217495		0.0833333			0.321334		0.36607		0.303836		0.163044		0.0729167
		0.228765		0.257005		0.213501		0.271666		0.0770833			0.250904		0.35722		0.291731		0.226691		0.0541667			0.196295		0.320352		0.271943		0.191879		0.0618056
	Average	0.247643		0.35207		0.251459		0.25803		0.0665278		Average	0.226495		0.29992		0.2577		0.19969		0.0663194		Average	0.244337		0.357318		0.274255		0.167546		0.0608333
	Last 5	0.318912		0.205156		0.262434		0.243333		0.0652778		Last 5	0.351644		0.195959		0.267457		0.214532		0.0673611		Last 5	0.118087		0.302785		0.201853		0.224026		0.0618056
		0.336071		0.342022		0.262531		0.423993		0.0611111			0.339973		0.230755		0.263156		0.289115		0.0645833			0.13632		0.351608		0.220376		0.20055		0.0472222
		0.317307		0.236999		0.295456		0.183955		0.0548611			0.364049		0.188044		0.303061		0.176989		0.0652778			0.176639		0.340826		0.242725		0.244723		0.0576389
		0.412203		0.206784		0.369857		0.26646		0.0534722			0.332049		0.186913		0.251454		0.198403		0.0479167			0.088275		0.274097		0.209747		0.157214		0.0458333
		0.164098		0.203314		0.051332		0.405242		0.0666667			0.38465		0.295795		0.296991		0.239752		0.0541667			0.099437		0.264467		0.222639		0.186766		0.0465278
	Average	0.309718		0.238855		0.248322		0.304597		0.0602778		Average	0.354473		0.219493		0.276424		0.223758		0.0598611		Average	0.123752		0.306757		0.219468		0.202656		0.0518056

## Sheet: CS04
CS04		EMG 1		EMG2		EMG 3		EMG 4		Kin3			EMG 1		EMG2		EMG 3		EMG 4		Kin3			EMG 1		EMG2		EMG 3		EMG 4		Kin3
	Soft food 1											Soft food 2											Soft food 3
	First 5	0.18939		0.212421		0.144975		0.046083		0.0645833		First 5	0.157682		0.21615		0.229003		0.077221		0.0861111		First 5	0.109389		0.125829		0.0875		0.042453		00,47,00
		0.182337		0.168468		0.160806		0.045637		00,56,00			0.18881		0.181323		0.241104		0.06413		0.0527778			0.1056		0.217078		0.136697		0.0747		0.0555556
		0.196865		0.194881		0.136483		0.045949		0.0465278			0.201272		0.202075		0.249393		0.07827		0.0583333			0.098014		0.153707		0.200631		0.074712		0.0541667
		0.186369		0.163421		0.161208		0.046109		00,56,00			0.204348		0.202863		0.209665		0.066895		0.0506944			0.070522		0.167038		0.137919		0.069886		00,55,00
		0.154021		0.151984		0.072317		0.03976		00,47,00			0.158548		0.188209		0.218423		0.073533		0.0555556			0.062976		0.153034		0.162959		0.068052		00,59,00
	Average	0.181796		0.178235		0.135158		0.0447076		0.0555556		Average	0.182132		0.198124		0.229518		0.0720098		0.0606944		Average	0.0893002		0.163337		0.145141		0.0659606		0.0548611
	Last 5	0.115126		0.246217		0.128893		0.065085		0.0486111		Last 5	0.114195		0.298876		0.230812		0.073527		00,55,00		Last 5	0.133354		0.363892		0.230052		0.09394		0.0590278
		0.151187		0.186821		0.077686		0.048735		00,58,00			0.07857		0.209113		0.182665		0.053002		00,44,00			0.195783		0.528848		0.141212		0.065332		00,49,00
		0.14383		0.166056		0.108371		0.061072		00,31,00			0.09376		0.137876		0.109382		0.05116		00,44,00			0.086705		0.222096		0.070186		0.0453		00,52,00
		0.131683		0.225099		0.085491		0.06013		0.0423611			0.122718		0.369468		0.141173		0.041897		00,57,00			0.118613		0.177857		0.115182		0.069		00,35,00
		0.152066		0.229676		0.075396		0.061259		00,46,00			0.128663		0.461946		0.172166		0.043565		0.0597222			0.054099		0.124315		0.163646		0.056765		0.05
	Average	0.138778		0.210774		0.0951674		0.0592562		0.0454861		Average	0.107581		0.295456		0.16724		0.0526302		0.0597222		Average	0.117711		0.283402		0.144056		0.0660674		0.0545139
		EMG 1		EMG2		EMG 3		EMG 4		Kin3			EMG 1		EMG2		EMG 3		EMG 4		Kin3			EMG 1		EMG2		EMG 3		EMG 4		Kin3
	Hard food 1											Hard food 2											Hard food 3
	First 5	0.172861		0.21052		0.246726		0.116475		0.0694444		First 5	0.274883		0.319906		0.225852		0.139751		0.115972		First 5	0.223282		0.146572		0.257012		0.130309		0.0673611
		0.200814		0.189411		0.285262		0.1012		0.0666667			0.246378		0.208019		0.157904		0.109539		0.0534722			0.237995		0.168737		0.288956		0.123543		0.0493056
		0.11867		0.161133		0.254493		0.117972		0.0534722			0.245492		0.174286		0.133981		0.109557		0.0520833			0.21981		0.161268		0.269776		0.120483		0.04375
		0.328332		0.302375		0.298705		0.142744		0.0798611			0.166134		0.181512		0.071759		0.079444		0.0416667			0.118447		0.122991		0.214485		0.095121		0.0576389
		0.24873		0.217926		0.175738		0.109953		0.0555556			0.205394		0.287308		0.284262		0.124611		0.0784722			0.33424		0.224408		0.270173		0.168142		0.0743056
	Average	0.213881		0.216273		0.252185		0.117669		0.065		Average	0.227656		0.234206		0.174752		0.11258		0.0683333		Average	0.226755		0.164795		0.26008		0.12752		0.0584722
	Last 5	0.116435		0.199436		0.064059		0.085507		00,56,00		Last 5	0.152167		0.144625		0.084097		0.089325		00,43,00		Last 5	0.147829		0.133242		0.079228		0.091617		00,38,00
		0.088365		0.181658		0.134027		0.110654		00,52,00			0.122158		0.193976		0.081457		0.096694		00,51,00			0.509373		1.56337		0.559859		0.182152		0.0444444
		0.139147		0.169504		0.067264		0.092383		00,55,00			0.081174		0.148698		0.208151		0.115988		0.0458333			0.047399		0.173863		0.046238		0.008608		00,36,00
		0.044594		0.163327		0.057459		0.015804		00,42,00			0.152816		0.158426		0.07619		0.078969		00,48,00			0.036498		0.205137		0.060465		0.017605		00,52,00
		0.080884		0.103986		0.04175		0.049071		0.04375			0.137168		0.235545		0.072674		0.094982		00,44,00			0.403807		1.04388		0.895696		0.649771		00,45,00
	Average	0.093885		0.163582		0.0729118		0.0706838		0.12		Average	0.129097		0.176254		0.104514		0.0951916		0.0458333		Average	0.228981		0.623898		0.328297		0.189951		0.0444444

## Sheet: CS52
CS52		EMG 1		EMG2		EMG 3		EMG 4		Kin3			EMG 1		EMG2		EMG 3		EMG 4		Kin3			EMG 1		EMG2		EMG 3		EMG 4		Kin3
	Soft food 1											Soft food 2											Soft food 3
	First 5											First 5	0.129446		0.105231		0.342705		0.11336		0.0784722		First 5	0.108623		0.116125		0.262989		0.081625		0.198611
			Discharged										0.118065		0.101505		0.301774		0.103157		0.0708333			0.105916		0.106232		0.31133		0.112274		0.203472
													0.194387		0.143008		0.410906		0.109087		0.0680556			0.238548		0.15722		0.397905		0.092589		0.209722
													0.17176		0.131363		0.485077		0.104328		0.0979167			0.200355		0.141275		0.48123		0.082241		0.211111
													0.186359		0.146533		0.475287		0.071003		0.0805556			0.198474		0.144782		0.469277		0.076353		0.23125
	Average											Average	0.160003		0.125528		0.40315		0.100187		0.0791667		Average	0.170383		0.133127		0.384546		0.0890164		0.210833
	Last 5											Last 5	0.129446		0.105231		0.342705		0.11336		0.0784722		Last 5	0.167397		0.143451		0.416754		0.119187		0.238889
													0.118065		0.101505		0.301774		0.103157		0.0708333			0.160002		0.119755		0.410611		0.080874		0.19375
													0.194387		0.143008		0.410906		0.109087		0.0680556			0.170877		0.137636		0.38085		0.084494		0.198611
													0.17176		0.131363		0.485077		0.104328		0.0979167			0.177429		0.12178		0.310975		0.108754		0.174306
													0.186359		0.146533		0.475287		0.071003		0.0805556			0.151133		0.125935		0.377309		0.069949		0.170833
	Average											Average	0.160003		0.125528		0.40315		0.100187		0.0791667		Average	0.165368		0.129711		0.3793		0.0926516		0.195278
		EMG 1		EMG2		EMG 3		EMG 4		Kin3			EMG 1		EMG2		EMG 3		EMG 4		Kin3			EMG 1		EMG2		EMG 3		EMG 4		Kin3
	Hard food 1											Hard food 2											Hard food 3
	First 5	0.163403		0.155951		0.409872		0.076477		0.0673611		First 5	0.254996		0.184412		0.501451		0.122005		0.202083		First 5	0.168627		0.145259		0.369261		0.070824		0.0625
		0.155472		0.112895		0.303157		0.0596		0.0638889			0.231382		0.166215		0.472994		0.132019		0.188194			0.265427		0.167901		0.397073		0.132531		0.120139
		0.419617		0.280808		0.838411		0.185752		0.140972			0.234945		0.140128		0.373926		0.093211		0.197222			0.186392		0.142643		0.436094		0.115357		0.104861
		0.199559		0.122463		0.364778		0.096276		0.0854167			0.192767		0.136319		0.39128		0.08172		0.204167			0.198605		0.164342		0.47069		0.231256		0.115278
		0.168587		0.134437		0.341013		0.075022		0.0819444			0.204721		0.127936		0.348437		0.090338		0.203472			0.148262		0.12599		0.332155		0.097395		0.0736111
	Average	0.221328		0.161311		0.451446		0.0986254		0.0879167		Average	0.223762		0.151002		0.417618		0.103859		0.199028		Average	0.193463		0.149227		0.401055		0.129473		0.0952778
	Last 5	0.199559		0.122463		0.364778		0.096276		0.0854167		Last 5	0.134303		2.24653		0.312197		0.099007		0.244444		Last 5	0.22206		0.175144		0.403211		0.151068		0.0819444
		0.168587		0.134437		0.341013		0.075022		0.0819444			0.182412		2.84722		0.360851		0.102333		0.236111			0.133069		0.103793		0.349308		0.070753		0.0833333
		0.16317		0.1285		0.397022		0.069208		0.0895833			0.191344		2.35069		0.375801		0.105345		0.242361			0.162918		0.130128		0.358121		0.111699		0.0701389
		0.228108		0.154591		0.400185		0.073849		0.0847222			0.149872		0.116318		0.27009		0.094372		0.180556			0.152154		0.116349		0.366242		0.089435		0.0680556
		0.261917		0.168572		0.555028		0.137916		0.0833333			0.150778		0.109473		0.3234		0.093577		0.201389			0.199057		0.119362		0.339714		0.093059		0.0555556
	Average	0.204268		0.141713		0.411605		0.0904542		0.085		Average	0.161742		1.53405		0.328468		0.0989268		0.220972		Average	0.173852		0.128955		0.363319		0.103203		0.0718056

## Sheet: CS53
CS53		EMG 1		EMG2		EMG 3		EMG 4		Kin3			EMG 1		EMG2		EMG 3		EMG 4		Kin3			EMG 1		EMG2		EMG 3		EMG 4		Kin3
	Soft food 1											Soft food 2											Soft food 3
	First 5	0.240079		0.307909		0.098321		0.211384		0.0472222		First 5	0.183273		0.227649		0.121271		0.102902		0.0430556		First 5	0.131117		0.198468		0.064776		0.071091		00,49,00
		0.161609		0.207094		0.094354		0.104056		00,50,00			0.244286		0.259296		0.177799		0.1089		00,59,00			0.164458		0.183076		0.079024		0.145828		0.0583333
		0.184906		0.186952		0.125875		0.095877		0.0423611			0.25495		0.253644		0.174436		0.122948		0.0708333			0.207075		0.258193		0.197067		0.136549		0.0618056
		0.21101		0.180929		0.160005		0.096744		00,52,00			0.29017		0.270407		0.264806		0.133436		0.0701389			0.222737		0.249033		0.167749		0.125542		0.0597222
		0.146501		0.232985		0.092354		0.140762		0.0520833			0.300759		0.250949		0.202594		0.153422		0.0798611			0.304102		0.277393		0.241971		0.165229		0.0736111
	Average	0.188821		0.223174		0.114182		0.129765		0.0472222		Average	0.254688		0.252389		0.188181		0.124322		0.0659722		Average	0.205898		0.233233		0.150117		0.128848		0.0633681
	Last 5	0.236181		0.189871		0.162123		0.1787		0.0652778		Last 5	0.165976		0.157682		0.163641		0.202186		0.0534722		Last 5	0.310669		0.294251		0.22268		0.412907		0.0527778
		0.228224		0.199185		0.200511		0.289875		0.0763889			0.248177		0.188531		0.163802		0.247894		0.0534722			0.185367		0.199645		0.166451		0.143204		0.0416667
		0.186765		0.213833		0.194655		0.168376		0.0625			0.188084		0.150673		0.17265		0.203561		0.0638889			0.069559		0.059189		0.031832		0.204638		0.0652778
		0.090858		0.058375		0.029644		0.195234		0.0722222			0.253449		0.24184		0.035209		0.237476		0.0597222			0.250372		0.225365		0.108325		0.361111		0.0826389
		0.223411		0.208056		0.168443		0.324792		0.0736111			0.099412		0.053648		0.428138		0.874758		0.106944			0.233314		0.194142		0.150403		0.175203		0.0486111
	Average	0.193088		0.173864		0.151075		0.231395		0.07		Average	0.19102		0.158475		0.192688		0.353175		0.0675		Average	0.209856		0.194518		0.135938		0.259413		0.0581944
		EMG 1		EMG2		EMG 3		EMG 4		Kin3			EMG 1		EMG2		EMG 3		EMG 4		Kin3			EMG 1		EMG2		EMG 3		EMG 4		Kin3
	Hard food 1											Hard food 2											Hard food 3
	First 5	0.270001		0.276159		0.22976		0.192824		0.0902778		First 5	0.2946		0.268618		0.239987		0.102785		0.0666667		First 5	0.261635		0.226548		0.239528		0.119716		0.075
		0.298718		0.31633		0.242718		0.102039		0.0736111			0.238208		0.167696		0.198992		0.071004		0.0652778			0.22094		0.207778		0.261887		0.071803		0.0569444
		0.327815		0.283389		0.247772		0.154613		0.08125			0.275858		0.242475		0.280736		0.117126		0.0902778			0.228218		0.245517		0.217061		0.183932		0.09375
		0.232955		0.218774		0.259757		0.198221		0.124306			0.21535		0.189481		0.185384		0.106994		0.0805556			0.226503		0.198106		0.175519		0.111712		0.0909722
		0.258417		0.243811		0.250882		0.149328		0.0944444			0.309648		0.259188		0.266305		0.181603		0.119444			0.159102		0.168371		0.138477		0.116214		0.0638889
	Average	0.277581		0.267693		0.246178		0.159405		0.0927778		Average	0.266733		0.225492		0.234281		0.115902		0.0844444		Average	0.21928		0.209264		0.206494		0.120675		0.0761111
	Last 5	0.143227		0.153065		0.138078		0.112979		0.0659722		Last 5	0.142458		0.210562		0.168164		0.135831		0.0506944		Last 5	0.15958		0.114176		0.106041		0.116727		0.0638889
		0.143536		0.121308		0.147762		0.112295		0.0736111			0.150693		0.079633		0.04416		0.271089		0.0798611			0.167356		0.100244		0.135328		0.116148		0.0527778
		0.161664		0.153382		0.152435		0.120588		0.075			0.1733		0.181599		0.080118		0.217415		0.1			0.146053		0.109228		0.105763		0.12563		0.0631944
		0.145613		0.157174		0.196514		0.138944		0.0652778			0.112638		0.133159		0.088894		0.076668		0.0486111			0.1435		0.123203		0.095505		0.101163		0.06875
		0.159493		0.111018		0.134754		0.142258		0.0666667			0.141026		0.145648		0.09716		0.078988		00,57,00			0.134545		0.080657		0.116742		0.109815		0.0583333
	Average	0.150707		0.139189		0.153909		0.125413		0.0693056		Average	0.144023		0.15012		0.0956992		0.155998		0.0697917		Average	0.150207		0.105502		0.111876		0.113897		0.0613889

## Sheet: CS54
CS54		EMG 1		EMG2		EMG 3		EMG 4		Kin3			EMG 1		EMG2		EMG 3		EMG 4		Kin3			EMG 1		EMG2		EMG 3		EMG 4		Kin3
	Soft food 1											Soft food 2											Soft food 3
	First 5	0.161579		0.202023		0.321831		0.345454		0.0645833		First 5	0.262571		0.099944		0.4011		0.391838		0.0791667		First 5	0.162726		0.128352		0.146235		0.430654		0.0798611
		0.163283		0.163905		0.272003		0.442866		0.0770833			0.271442		0.115941		0.417217		0.398655		0.0763889			0.139072		0.123567		0.204904		0.319741		0.0666667
		0.153778		0.199529		0.309738		0.284445		0.0541667			0.244212		0.072121		0.221705		0.282845		0.075			0.184418		0.183544		0.347341		0.425437		0.0756944
		0.228255		0.276044		0.433788		0.540087		0.0659722			0.224141		0.130936		0.319		0.363584		0.0645833			0.181934		0.230108		0.464373		0.390246		0.0736111
		0.169896		0.275804		0.513462		0.504799		0.0680556			0.224094		0.099339		0.336182		0.386455		0.0638889			0.218313		0.233598		0.572742		0.490787		0.0659722
	Average	0.175358		0.223461		0.370164		0.42353		0.0659722		Average	0.245292		0.103656		0.339041		0.364675		0.0718056		Average	0.177293		0.179834		0.347119		0.411373		0.0723611
	Last 5	0.228255		0.276044		0.433788		0.540087		0.0659722		Last 5	0.271442		0.115941		0.417217		0.398655		0.0763889		Last 5	0.160704		0.196486		3.22569		0.307405		0.0722222
		0.169896		0.275804		0.513462		0.504799		0.0680556			0.244212		0.072121		0.221705		0.341157		0.075			0.209243		0.242139		2.67708		0.695422		0.0847222
		0.154939		0.22924		0.406161		0.5965		0.0680556			0.224141		0.130936		0.319		0.282845		0.0645833			0.162956		0.189452		2.92361		0.520594		0.0652778
		0.172244		0.252038		0.369602		0.547225		0.0701389			0.224094		0.099339		0.336182		0.363584		0.0638889			0.164574		0.186448		3.36806		0.559853		0.0722222
		0.258269		0.220155		0.374104		0.518029		0.0916667			0.248015		0.121807		0.28931		0.386455		0.0680556			0.149532		0.223575		3.40625		0.394328		0.0694444
	Average	0.196721		0.250656		0.419423		0.541328		0.0727778		Average	0.242381		0.108029		0.316683		0.354539		0.0695833		Average	0.169402		0.20762		3.12014		0.49552		0.0727778
		EMG 1		EMG2		EMG 3		EMG 4		Kin3			EMG 1		EMG2		EMG 3		EMG 4		Kin3			EMG 1		EMG2		EMG 3		EMG 4		Kin3
	Hard food 1											Hard food 2											Hard food 3
	First 5	0.31519		0.156496		0.451798		0.386364		0.09375		First 5	0.294629		0.14362		0.379203		0.299558		0.0993056		First 5	0.437919		0.151372		0.61473		0.312667		0.0951389
		0.305659		0.166167		0.406287		0.405342		0.0895833			0.34484		0.131576		0.571114		0.314777		0.0763889			0.202433		0.095312		0.282531		0.277814		0.0604167
		0.250871		0.163175		0.389221		0.348578		0.0784722			0.310574		0.128823		0.415494		0.315253		0.0673611			0.150693		0.057632		0.153859		0.187166		0.0868056
		0.301341		0.110279		0.460321		0.288104		0.0659722			0.323571		0.13583		0.544546		0.323474		0.0819444			0.332866		0.151352		0.399097		0.175226		0.0513889
		0.29802		0.098748		0.354476		0.286385		0.0555556			0.306057		0.091915		0.463594		0.286914		0.0722222			0.277561		0.113904		0.361946		0.275091		0.0715278
	Average	0.294216		0.138973		0.412421		0.342955		0.0766667		Average	0.315934		0.126353		0.47479		0.307995		0.0794444		Average	0.280294		0.113914		0.362433		0.245593		0.0730556
	Last 5	0.184115		0.207321		0.396304		0.288969		0.0597222		Last 5	0.313565		0.12066		0.410022		0.486104		0.0652778		Last 5	0.219092		0.240674		0.362551		0.524301		0.0638889
		0.171087		0.174854		0.287456		0.413071		0.0583333			0.162693		0.163542		0.234831		0.540399		0.0493056			0.183935		0.229848		0.298066		0.310102		0.0513889
		0.155389		0.232478		0.40535		0.410059		0.0736111			0.1328		0.088485		0.138174		0.364663		0.05625			0.212076		0.112804		0.29584		0.257066		0.0451389
		0.184115		0.207321		0.396304		0.288969		0.0597222			0.304076		0.134468		0.283646		0.555448		0.0604167			0.119757		0.148329		0.253416		0.373669		0.0597222
		0.171087		0.174854		0.287456		0.413071		0.0583333			0.247674		0.088155		0.129625		0.35331		0.0548611			0.163408		0.133102		0.140524		0.287837		0.0659722
	Average	0.173159		0.199366		0.354574		0.362828		0.0619444		Average	0.232162		0.119062		0.23926		0.459985		0.0572222		Average	0.179654		0.172951		0.270079		0.350595		0.0572222

## Sheet: CS55
CS55		EMG 1		EMG2		EMG 3		EMG 4		Kin3			EMG 1		EMG2		EMG 3		EMG 4		Kin3			EMG 1		EMG2		EMG 3		EMG 4		Kin3
	Soft food 1											Soft food 2											Soft food 3
	First 5	0.174432		0.170818		0.331482		0.162938		0.0611111		First 5	0.25653		0.169242		0.439022		0.213382		0.0645833		First 5	0.25653		0.169242		0.439022		0.213382		0.0645833
		0.168839		0.136965		0.309103		0.167752		0.0645833			0.232398		0.328392		0.722024		0.30602		0.0625			0.232398		0.328392		0.722024		0.30602		0.0625
		0.197993		0.140369		0.348502		0.132937		0.0604167			0.136009		0.138976		0.501057		0.160048		0.05			0.136009		0.138976		0.501057		0.160048		0.05
		0.129176		0.191801		0.457727		0.1965		0.0729167			0.203558		0.242764		0.437811		0.257488		0.0618056			0.203558		0.242764		0.437811		0.257488		0.0618056
		0.136996		0.165958		0.416854		0.14391		0.0597222			0.173083		0.165781		0.378599		0.181662		0.0590278			0.173083		0.165781		0.378599		0.181662		0.0590278
	Average	0.161487		0.161182		0.372734		0.160807		0.06375		Average	0.200316		0.209031		0.495703		0.22372		0.0595833		Average	0.200316		0.209031		0.495703		0.22372		0.0595833
	Last 5	0.129176		0.191801		0.457727		0.1965		0.0729167		Last 5	0.173083		0.165781		0.378599		0.181662		0.0590278		Last 5	0.173083		0.165781		0.378599		0.181662		0.0590278
		0.136996		0.165958		0.416854		0.14391		0.0597222			0.14469		0.202199		0.396379		0.21578		0.0666667			0.14469		0.202199		0.396379		0.21578		0.0666667
		0.112574		0.205487		0.377494		0.198261		0.0583333			0.112082		0.138238		0.320269		0.146506		0.0513889			0.112082		0.138238		0.320269		0.146506		0.0513889
		0.139508		0.140738		0.331795		0.280766		0.0694444			0.138641		0.243749		0.440409		0.277629		0.0645833			0.138641		0.243749		0.440409		0.277629		0.0645833
		0.114002		0.111837		0.192303		0.194264		00,58,00			0.162247		0.230773		0.425489		0.24366		0.0555556			0.162247		0.230773		0.425489		0.24366		0.0555556
	Average	0.126451		0.163164		0.355235		0.20274		0.0651042		Average	0.146149		0.196148		0.392229		0.213047		0.0594444		Average	0.146149		0.196148		0.392229		0.213047		0.0594444
		EMG 1		EMG2		EMG 3		EMG 4		Kin3			EMG 1		EMG2		EMG 3		EMG 4		Kin3			EMG 1		EMG2		EMG 3		EMG 4		Kin3
	Hard food 1											Hard food 2											Hard food 3
	First 5	0.246884		0.293867		0.477762		0.211535		0.0569444		First 5	0.229207		0.317581		0.409001		0.264653		0.0534722		First 5	0.349912		0.413827		0.622606		0.252939		0.0708333
		0.286651		0.228746		0.599388		0.278643		0.0541667			0.335916		0.346679		0.6768		0.372847		0.0583333			0.35047		0.370903		0.566646		0.258282		0.0513889
		0.292085		0.322029		0.556957		0.295726		0.0548611			0.277943		0.29045		0.677748		0.208101		0.0625			0.284148		0.254362		0.630362		0.527703		0.0680556
		0.34297		0.354178		0.513714		0.302938		00,50,00			0.253635		0.324899		0.578842		0.197495		0.0451389			0.213209		0.195794		0.560019		0.429893		0.0895833
		0.200482		0.185563		0.471518		0.215978		0.0479167			0.275449		0.312151		0.54719		0.334574		0.06875			0.284211		0.397506		0.512131		0.282601		0.0659722
	Average	0.273814		0.276877		0.523868		0.260964		0.0534722		Average	0.27443		0.318352		0.577916		0.275534		0.0576389		Average	0.29639		0.326478		0.578353		0.350284		0.0691667
	Last 5	0.088319		0.139418		0.18367		0.140519		00,34,00		Last 5	0.15445		0.141303		0.241048		0.166416		00,52,00		Last 5	0.205882		0.25945		0.411213		0.216519		0.0625
		0.15476		0.168394		0.3155		0.18431		00,58,00			0.168225		0.187956		0.330235		0.177692		00,49,00			0.139518		0.132523		0.394356		0.159802		0.0527778
		0.119814		0.147988		0.232404		0.144751		00,38,00			0.188574		0.236269		0.326735		0.397883		0.0854167			0.165179		0.206276		0.288176		0.321582		0.0569444
		0.149069		0.227707		0.372911		2.4639		0.0541667			0.216675		0.24425		0.279883		0.258341		0.0631944			0.17269		0.188765		0.344056		0.314691		0.0444444
		0.15033		0.207364		0.310386		2.83382		0.0645833			0.156319		0.215799		0.173552		0.645878		0.0736111			0.213655		0.196841		0.277049		0.253434		0.0416667
	Average	0.132458		0.178174		0.282974		1.15346		0.059375		Average	0.176849		0.205115		0.270291		0.329242		0.0740741		Average	0.179385		0.196771		0.34297		0.253206		0.0516667

## Sheet: CS56
CS56		EMG 1		EMG2		EMG 3		EMG 4		Kin3			EMG 1		EMG2		EMG 3		EMG 4		Kin3			EMG 1		EMG2		EMG 3		EMG 4		Kin3
	Soft food 1											Soft food 2											Soft food 3
	First 5	0.277472		0.224506		0.268918		0.232833		0.101389		First 5	0.240762		0.231295		0.276227		0.23867		0.116667		First 5	0.128936		0.225287		0.059576		0.449402		0.221528
		0.237557		0.241533		0.305088		0.192479		0.10625			0.195335		0.203032		0.256371		0.1777		0.0909722			0.23829		0.204223		0.165479		0.267735		0.170139
		0.194121		0.216369		0.266154		0.200815		0.0888889			0.221875		0.227312		0.263377		0.141451		0.0868056			0.180823		0.193078		0.19871		0.218724		0.115278
		0.188204		0.249853		0.254875		0.241987		0.0895833			0.255292		0.222757		0.239067		0.163918		0.0791667			0.168751		0.127636		0.186084		0.189096		0.115972
		0.238737		0.202807		0.199924		0.292666		0.0923611			0.265873		0.227179		0.303619		0.277412		0.0868056			0.268944		0.264981		0.320913		0.201648		0.0861111
	Average	0.227218		0.227014		0.258992		0.232156		0.0956944		Average	0.235827		0.222315		0.267732		0.19983		0.0920833		Average	0.197149		0.203041		0.186152		0.265321		0.141806
	Last 5	0.188204		0.249853		0.254875		0.241987		0.0895833		Last 5	0.308049		0.202747		0.209605		0.40715		0.0888889		Last 5	0.366852		0.203431		0.235024		0.273974		0.0770833
		0.238737		0.202807		0.199924		0.292666		0.0923611			0.401489		0.241653		0.217742		0.351005		0.104167			0.498548		0.289859		0.404429		0.359624		0.113889
		0.328012		0.241656		0.353087		0.301931		0.0756944			0.378584		0.230696		0.272191		0.342349		0.0993056			0.297992		0.249545		0.181279		0.357071		0.0986111
		0.370247		0.198141		0.280133		0.309055		0.0993056			0.348796		0.227173		0.187449		0.348405		0.108333			0.268989		0.182144		0.158216		0.277671		0.0972222
		0.541852		0.283374		0.264205		0.316214		0.0895833			0.398756		0.24451		0.40333		0.383814		0.0861111			0.366852		0.203431		0.235024		0.273974		0.0770833
	Average	0.33341		0.235166		0.270445		0.292371		0.0893056		Average	0.367135		0.229356		0.258063		0.366545		0.0973611		Average	0.359847		0.225682		0.242794		0.308463		0.0927778
		EMG 1		EMG2		EMG 3		EMG 4		Kin3			EMG 1		EMG2		EMG 3		EMG 4		Kin3			EMG 1		EMG2		EMG 3		EMG 4		Kin3
	Hard food 1											Hard food 2											Hard food 3
	First 5	0.217553		0.252389		0.149061		0.132895		0.104167		First 5	0.478887		0.330162		0.400387		0.166243		0.111806		First 5	0.578503		0.317247		0.380787		0.176028		0.0951389
		0.425495		0.381883		0.404946		0.340606		0.145833			0.595458		0.36526		0.461046		0.279251		0.174306			0.526914		0.26185		0.333696		0.172522		0.104167
		0.212189		0.296452		0.2503		0.190521		0.06875			0.330433		0.143388		0.270961		0.126342		0.104861			0.586428		0.308636		0.431821		0.273471		0.115278
		0.118023		0.079891		0.03111		0.147416		0.0895833			0.643713		0.323848		0.499851		0.266169		0.148611			0.445227		0.210454		0.332708		0.154779		0.0868056
		0.211338		0.323775		0.328529		0.149292		0.0770833			0.560426		0.265095		0.369879		0.208001		0.0986111			0.451614		0.218761		0.29796		0.232898		0.0763889
	Average	0.23692		0.266878		0.232789		0.192146		0.0970833		Average	0.521783		0.285551		0.400425		0.209201		0.127639		Average	0.517737		0.26339		0.355394		0.20194		0.0955556
	Last 5	0.077817		0.201539		0.180929		0.168611		0.0555556		Last 5	0.560802		0.257019		0.417121		0.366867		0.135417		Last 5	0.232299		0.115249		0.276767		0.156181		0.0756944
		0.135003		0.255371		0.189112		0.237285		0.0840278			0.379647		0.22587		0.349552		0.25089		0.119444			0.208284		0.138437		0.192095		0.197521		0.0965278
		0.100721		0.224294		0.197773		0.240605		0.0798611			0.476806		0.232254		0.458468		0.181639		0.121528			0.232249		0.152937		0.194862		0.231459		0.0875
		0.087336		0.246204		0.217397		0.205834		0.0819444			0.33055		0.163126		0.252405		0.280199		0.107639			0.08866		0.109857		0.042032		0.324543		0.0652778
		0.101473		0.244931		0.191399		0.304046		0.1125			0.286988		0.21751		0.277046		0.266703		0.0958333			0.065503		0.109882		0.027458		0.134701		0.0673611
	Average	0.10047		0.234468		0.195322		0.231276		0.0827778		Average	0.406959		0.219156		0.350918		0.26926		0.115972		Average	0.165399		0.125272		0.146643		0.208881		0.0784722
