# Supplementary material for: Oral function in patients with myasthenia gravis
Source: PeerJ. 2021 Jun 29;9:e11680. doi: 10.7717/peerj.11680 (PMC8253106; doi:10.7717/peerj.11680)
Supplement: Supplemental Information 2 [file peerj-09-11680-s002.xls]

## Sheet: Sheet1
Peak force (Nm)
	CS01	CS02	CS03	CS04	CS51	CS52	CS53	CS54	CS55	CS56	MG01	MG02	MG03	MG04	MG05	MG51	MG52	MG53	MG54	MG55	MG56	MG57	MG58	MG59
Time 1	31.75	32	23	16	20.42	41.13	17	43.37	27	12	35.17	9.29	29.41	3	7	10.07	13.38	28.23	39.17	22.67	28.53	1.48	26.18	20
Time 2	34.39	32	32	24	22.28	42.3	22	45.62	24	10	58.89	6.75	31.85	%	4	19.84	11.14	29.01	45.32	28.52	16.42	2.75	31.65	20
Time 3	28.33	28	32	28	3.33	41.42	32	52.55	20	11	54.02	6.65	20.32	%	7	12.32	24.72	22.49	38.1	22.38	17.59	3.14	41.52	16
Time 4	33.77	33	35	32	29.2	32.14	28	50.11	21	14	55.68	6.64	31.16	%	4	9.78	16.61	27.75	38	34.97	16.42	2.45	51.18	7
Mean	32.06	31.25	30.5	25	18.8075	39.2475	24.75	47.9125	23	11.75	50.94	7.3325	28.185		5.5	13.0025	16.4625	26.87	40.1475	27.135	19.74	2.455	37.6325	15.75
