# Supplementary material for: Oral function in patients with myasthenia gravis
Source: PeerJ. 2021 Jun 29;9:e11680. doi: 10.7717/peerj.11680 (PMC8253106; doi:10.7717/peerj.11680)
Supplement: Supplemental Information 3 [file peerj-09-11680-s003.xlsx]

## Sheet: Sheet1
	Patients			Burst area								Kinetic 3
		ID		EMG 1 - first 5	EMG 1- last 5	EMG 2 - First 5	EMG 2 -last 5	EMG 3 - First 5	EMG 3 - last 5	EMG 4 - First 5	EMG 4 - last 5	Vertical movement - first 5	Vertical movement last 5
		MG51	Soft food 1	0.39	0.590739	0.25	0.446524	0.19	0.35053	0.57	1.03124	0.07	0.05
			Soft food 2	0.31	0.63	0.21	0.46	0.19	0.451982	0.43	0.847348	0.075463	0.07
			Soft food 3	0.31	0.32	0.21	0.24	0.23	0.34	0.38	0.488399	0.0774306	0.07
			Hard food 1	0.26	0.435164	0.25	0.33	0.4	0.23	0.22	0.800755	0.1	0.07
			Hard food 2	0.3	0.345636	0.28	0.26	0.54705	0.384355	0.18	0.401645	0.1	0.05
			Hard food 3	0.2	0.514568	0.18	0.43291	0.270357	0.377438	0.17	0.680499	0.1	0.08
		MG52	Soft food 1	0.12	0.725925	0.12	0.759032	0.09	0.867158	0.31	2.11307	0.06	0.05
			Soft food 2	0.15	0.46	0.13	0.42	0.08	0.42	0.37	1.37017	0.09	0.05
			Soft food 3	0.09	0.508784	0.07	0.496682	0.06	0.494658	0.19	1.25235	0.04	0.06
			Hard food 1	0.12	0.24	0.11	0.21	0.17	0.2	0.19	0.659297	0.05	0.08
			Hard food 2	0.11	0.28	0.09	0.27	0.14	0.26	0.22	0.733333	0.08	0.06
			Hard food 3	0.14	0.21	0.15	0.2	0.22	0.16	0.25	0.504845	0.09	0.05
		MG54	Soft food 1	0.66	0.48	1.04247	0.78	0.17	0.2	0.69	0.47	0.08	0.08
			Soft food 2	0.828283	0.63	1.26882	0.985356	0.13	0.1	0.867871	0.662234	0.09	0.05
			Soft food 3	0.49	0.42	0.82	0.66	0.13	0.09	0.57	0.45	0.08	0.07
			Hard food 1	0.5	0.34	0.87168	0.61	0.11	0.07	0.53	0.4	0.09	0.06
			Hard food 2	0.52	0.36	0.872569	0.66	0.09	0.06	0.59	0.45	0.09	0.06
			Hard food 3	0.42	0.3	0.72	0.5	0.11	0.08	0.47	0.31	0.1	0.07
		MG55	Soft food 1	0.25	0.31	0.17	0.13	0.24	0.12	0.19	0.32	0.08	0.11
			Soft food 2	0.16	0.18	0.36	0.25	0.19	0.12	0.22	0.42	0.09	0.08
			Soft food 3	0.15	0.14	0.41	0.29	0.21	0.12	0.26	0.35	0.09	0.11
			Hard food 1	0.19	0.12	0.55	0.34	0.34	0.14	0.21	0.28	0.14	0.1
			Hard food 2	0.15	0.1	0.49	0.27	0.37	0.09	0.2	0.28	0.11	0.09
			Hard food 3	0.18	0.13	0.51	0.38	0.35	0.14	0.2	0.36	0.13	0.12
		MG56	Soft food 1	0.37	0.13	0.3	0.17	0.746623	0.12	0.45	0.802396	0.08	0.06
			Soft food 2	0.29	0.22	0.2	0.23	0.43	0.769933	0.43	0.73	0.08	0.06
			Soft food 3	0.35	0.16	0.24	0.18	0.66	0.22	0.31	0.7	0.1	0.08
			Hard food 1	0.21	0.14	0.31	0.22	0.52	0.34	0.34	0.67	0.11	0.09
			Hard food 2	0.2	0.11	0.41	0.16	0.63	0.16	0.38	0.59	0.1	0.08
			Hard food 3	0.31	0.11	0.28	0.18	0.62	0.16	0.35	0.45	0.1	0.08
		MG57	Soft food 1	0.265685	0.36943	0.214505	0.267048	0.0786166	0.139425	0.406193	0.628188	0.0763889	0.08375
			Soft food 2	0.324162	0.16776	0.276901	0.148427	0.146862	0.0837364	0.456449	0.382188	0.0645833	0.0416667
			Soft food 3	0.285248	0.255661	0.252475	0.234893	0.123537	0.103207	0.518228	0.790086	0.0720833	0.0678241
			Hard food 1	0.346656	0.264706	0.326059	0.202755	0.16875	0.153754	0.505624	0.357112	0.0534722	0.04375
			Hard food 2	0.259611	0.307745	0.209012	0.225058	0.126562	0.173494	0.451279	0.456061	0.0604167	0.0590278
			Hard food 3	0.271425	0.188771	0.224494	0.153531	0.160805	0.109804	0.449766	0.363612	0.0663889	0.0456597
		MG58	Soft food 1	0.344908	0.369303	0.369364	0.302071	0.387245	0.407405	0.283922	0.309465	0.0234722	0.0236111
			Hard food 1	0.166754	0.231772	0.843855	0.10799	0.592958	0.350225	0.320729	0.214861	0.0311111	0.0273611
			Hard food 2	0.442249	0.268455	0.475869	0.295197	0.695299	0.471281	0.305217	0.183204	0.0276389	0.0223611
			Hard food 3	0.15921	0.108599	0.826087	0.609014	0.518195	0.398097	0.225814	0.202196	0.0286111	0.0265278
		MG59	Soft food 1	0.352041	0.350937	0.329299	0.681443	0.241424	0.361516	0.315767	0.473306	0.0606944	0.06375
			Soft food 2	0.219305	0.331617	0.277551	0.594845	0.168529	0.284624	0.185353	0.416873	0.0520833	0.0710069
			Soft food 3	0.207503	0.29692	0.319842	0.582495	0.236752	0.291844	0.220642	0.428371	0.0559722	0.0620833
			Hard food 1	0.240328	0.320144	0.512953	0.375762	0.317195	0.252054	0.239002	0.294774	0.0670833	0.0694444
			Hard food 2	0.277158	0.184674	0.376858	0.384547	0.294978	0.210548	0.185026	0.17834	0.0598611	0.05875
			Hard food 3	0.277375	0.179476	0.271062	0.403975	0.260609	0.207964	0.196312	0.178266	0.05875	0.0640278
		MG01	Soft food 1	0.0924678	0.0924678	0.127918	0.0924678	0.0417812	0.0924678	0.0815366	0.0924678	0.0619444	0.0924678
			Soft food 2	0.107643	0.109835	0.107643	0.107886	0.06965	0.070928	0.136722	0.153926	0.0872222	0.0873611
			Hard food 1	0.198718	0.148034	0.185066	0.117862	0.197153	0.108401	0.174113	0.174055	0.101667	0.07875
			Hard food 2	0.168038	0.179401	0.319982	0.24609	0.201938	0.213601	0.135896	0.147347	0.0854167	0.0809722
			Hard food 3	0.167578	0.143949	0.195672	0.132759	0.185251	0.120041	0.149272	0.127539	0.0902778	0.07375
		MG02	Soft food 1	0.133828	0.137941	0.0517014	0.057914	0.157983	0.189207	0.100803	0.194074	0.0833333	0.0630556
			Soft food 2	0.111281	0.173213	0.086539	0.0793782	0.151275	0.269794	0.142575	0.214984	0.0918056	0.0919444
			Soft food 3	0.203578	0.156683	0.118676	0.0636904	0.220758	0.236705	0.146819	0.137509	0.0851389	0.102639
			Hard food 1	0.220507	0.104329	0.083559	0.0593762	0.163027	0.0426598	0.138139	0.176272	0.0901389	0.0765278
			Hard food 2	0.211183	0.112985	0.0601224	0.0607962	0.265348	0.0911108	0.145666	0.149544	0.0683333	0.0772222
			Hard food 3	0.271632	0.123701	0.066493	0.0458294	0.239829	0.0997968	0.131654	0.158239	0.0743056	0.0748611
		MG04	Soft food 1	0.175231	0.168841	0.0850152	0.102188	0.196305	0.0941478	0.281373	0.325724	0.0682292	0.0998611
			Soft food 2	0.110953	0.13611	0.0454996	0.0916556	0.134664	0.104051	0.117595	0.214945	0.0683333	0.0622222
			Soft food 3	0.144402	0.1792	0.0701246	0.122316	0.181393	0.143644	0.224819	0.278742	0.0838889	0.0643056
			Hard food 1	0.184247	0.151822	0.139055	0.165236	0.233713	0.258045	0.288891	0.224755	0.0826389	0.111111
			Hard food 2	0.151904	0.176549	0.0767046	0.14606	0.300535	0.260751	0.15238	0.258135	0.0688889	0.131389
			Hard food 3	0.133912	0.136649	0.120315	0.173922	0.247201	0.275342	0.295086	0.187679	0.0891667	0.102778
		MG05	Soft food 1	0.123505	0.109609	0.161794	0.0933476	0.0940958	0.128316	0.104788	0.166902	0.0472222	0.05875
			Soft food 2	0.106889	0.183716	0.109707	0.222856	0.0814428	0.237852	0.125121	0.382789	0.0430556	0.0656944
			Soft food 3	0.105203	0.0714594	0.140984	0.0778062	0.089079	0.117312	0.149049	0.126916	0.0430556	0.0587963
			Hard food 1	0.127793	0.0926836	0.202815	0.0970722	0.086227	0.090688	0.132482	0.269024	0.0666667	0.07125
			Hard food 2	0.0990106	0.105804	0.152184	0.132421	0.066363	0.150169	0.143662	0.090716	0.0680556	0.0661111
			Hard food 3	0.14207	0.0574148	0.137734	0.0768228	0.101623	0.0921444	0.155283	0.170406	0.0604167	0.0717014
		AVERAGE
	Significance test

## Sheet: MG51
		Soft food 1											Soft food 2											Soft food 3
	MG51	EMG1		EMG 2		EMG3		EMG 4		KIN 3			EMG1		EMG 2		EMG3		EMG 4		KIN 3			EMG1		EMG 2		EMG3		EMG 4		KIN 3
		First 5	0.486346		0.332484		0.109674		0.780426		0.115972		First 5	0.38652		0.253364		0.088089		0.565618		0.0833333		First 5	0.440333		0.264299		0.09038		0.62637		0.0958333
			0.656019		0.442037		0.242521		0.958878		00,59,00			0.303615		0.209718		0.184884		0.402258		0.0666667			0.101621		0.061721		0.021613		0.136515		00,54,00
			0.357225		0.184342		0.221394		0.458682		0.0604167			0.388531		0.23566		0.401559		0.539375		0.0763889			0.242102		0.159501		0.150692		0.298158		0.0652778
			0.166052		0.098165		0.146134		0.262383		0.04375			0.186635		0.1796		0.141035		0.318544		00,59,00			0.577076		0.455872		0.663969		0.644892		0.0680556
			0.309003		0.193626		0.228072		0.395393		0.0479167			0.28433		0.180296		0.15338		0.327529		00,57,00			0.187649		0.10875		0.212764		0.213801		0.0805556
		Average	0.394929		0.250131		0.189559		0.571152		0.0670139		Average	0.309926		0.211728		0.193789		0.430665		0.075463		Average	0.309756		0.210029		0.227884		0.383947		0.0774306
		Last 5	0.358655		0.301384		0.192554		0.580804		0.0513889		Last 5	0.695467		0.452078		1.10616		0.777855		0.0798611		Last 5	0.64568		0.38353		0.905143		0.937005		0.09375
			0.199257		0.141679		0.084284		0.238292		00,48,00			0.998638		0.722368		0.633722		1.38194		0.0784722			0.107999		0.131995		0.09624		0.169693		0.0840278
			1.38659		0.999144		0.721922		2.7105		0.0506944			0.924093		0.601831		0.219698		1.24901		0.0597222			0.10014		0.084052		0.058563		0.141376		0.0444444
			0.826755		0.616583		0.674711		1.34987		00,48,00			0.29815		0.287482		0.182115		0.438522		0.0833333			0.615825		0.51229		0.522763		1.0224		0.0819444
			0.182435		0.173831		0.079181		0.276716		0.0506944			0.230157		0.21891		0.118218		0.389408		0.0666667			0.126357		0.092934		0.100795		0.171519		0.0618056
		Average	0.590739		0.446524		0.35053		1.03124		0.0509259		Average	0.629301		0.456534		0.451982		0.847348		0.0736111		Average	0.3192		0.24096		0.336701		0.488399		0.0731944
		Hard food 1											Hard food 2											Hard food 3
		EMG1		EMG 2		EMG3		EMG 4		KIN 3			EMG1		EMG 2		EMG3		EMG 4		KIN 3			EMG1		EMG 2		EMG3		EMG 4		KIN 3
		First 5	0.154655		0.103781		0.03214		0.302272		0.152083		First 5	0.153127		0.086007		0.032716		0.206185		0.131944		First 5	0.12989		0.085259		0.030235		0.183907		0.125694
			0.159401		0.109884		0.186543		0.15294		0.0854167			0.122381		0.125378		0.129185		0.117188		0.0951389			0.053332		0.034564		0.016318		0.079713		0.0930556
			0.591273		0.620657		1.37359		0.324671		0.0854167			0.818916		0.746984		1.86181		0.314097		0.0854167			0.102194		0.095904		0.04509		0.133136		0.0819444
			0.215527		0.212372		0.439446		0.183735		0.0868056			0.281266		0.272228		0.430113		0.137166		0.09375			0.115586		0.112356		0.085237		0.158867		0.0923611
			0.155501		0.181629		0.318484		0.159396		0.0909722			0.125501		0.168246		0.281426		0.115763		0.0986111			0.590402		0.582952		1.1749		0.270741		0.0923611
		Average	0.255271		0.245665		0.4		0.224603		0.100139		Average	0.300238		0.279769		0.54705		0.17808		0.100972		Average	0.198281		0.182207		0.270357		0.165273		0.0970833
		Last 5	0.117627		0.157587		0.145597		0.141964		0.0909722		Last 5	0.260289		0.182862		0.191605		0.299944		0.0645833		Last 5	0.33686		0.251918		0.091701		0.451082		0.0763889
			0.094335		0.071038		0.045985		0.112398		0.0465278			1.01072		0.768963		1.38936		1.19198		0.123611			0.303049		0.34171		0.183701		0.407496		0.0965278
			0.602714		0.462468		0.394908		1.00404		0.0743056			0.123014		0.117887		0.117108		0.11252		0.126389			0.086167		0.122601		0.114653		0.104588		0.0847222
			1.09127		0.754899		0.359791		2.3199		0.0645833			0.067109		0.060196		0.056776		0.090834		00,50,00			0.197277		0.189503		0.097779		0.296764		0.0569444
			0.269875		0.202874		0.209797		0.425474		0.0597222			0.267049		0.18235		0.16692		0.31295		0.0493056			1.64949		1.25882		1.39935		2.14256		0.0805556
		Average	0.435164		0.329773		0.231216		0.800755		0.0672222		Average	0.345636		0.262452		0.384355		0.401645		0.0493056		Average	0.514568		0.43291		0.377438		0.680499		0.0790278

## Sheet: MG52
	Soft food 1											Soft food 2											Soft food 3
MG52	EMG1		EMG 2		EMG3		EMG 4		KIN 3			EMG1		EMG 2		EMG3		EMG 4		KIN 3			EMG1		EMG 2		EMG3		EMG 4		KIN 3
	First 5	0.064455		0.063453		0.056658		0.180546		00,26,00		First 5	0.165274		0.140777		0.096117		0.464484		0.116667		First 5	0.068695		0.042279		0.038831		0.131961		00,29,00
		0.152481		0.12152		0.112372		0.326329		00,39,00			0.146368		0.142006		0.090386		0.34779		00,29,00			0.065665		0.060019		0.042449		0.168713		00,43,00
		0.094337		0.091102		0.069732		0.258295		00,37,00			0.082984		0.060286		0.038311		0.203624		00,34,00			0.136115		0.11641		0.128645		0.262148		00,32,00
		0.149395		0.189452		0.123957		0.445697		0.0555556			0.098838		0.106519		0.042477		0.256233		00,54,00			0.104955		0.103428		0.077154		0.201931		00,43,00
		0.145984		0.129559		0.106134		0.34799		0.0701389			0.24731		0.203286		0.127468		0.586503		0.0548611			0.067428		0.049563		0.031234		0.190062		0.0430556
	Average	0.12133		0.119017		0.0937706		0.311771		0.0628472		Average	0.148155		0.130575		0.0789518		0.371727		0.0857639		Average	0.0885716		0.0743398		0.0636626		0.190963		0.0430556
	Last 5	0.800212		0.783478		0.461097		2.3382		0.0555556		Last 5	0.128349		0.112093		0.102974		0.369911		0.0472222		Last 5	0.092347		0.076532		0.085724		0.157839		0.04375
		0.275354		0.280589		0.344559		0.809201		0.0555556			0.817771		0.799451		0.672994		2.46727		0.05625			0.118003		0.081047		0.093933		0.205054		0.0444444
		0.795856		0.899394		1.42808		2.19043		0.0493056			0.287304		0.239275		0.222077		0.854001		0.0541667			0.107457		0.089748		0.076403		0.220591		0.04375
		1.23165		1.27451		1.56943		3.52752		0.0472222			0.912071		0.79921		0.958262		2.66141		0.0569444			1.97234		2.01444		1.81889		5.06206		0.0763889
		0.526554		0.557183		0.532629		1.7		00,59,00			0.174046		0.140207		0.168637		0.49825		0.0493056			0.253775		0.221643		0.398336		0.616205		0.0736111
	Average	0.725925		0.759032		0.867158		2.11307		0.0519097		Average	0.463908		0.418047		0.424989		1.37017		0.0527778		Average	0.508784		0.496682		0.494658		1.25235		0.0563889
	Hard food 1											Hard food 2											Hard food 3
	EMG1		EMG 2		EMG3		EMG 4		KIN 3			EMG1		EMG 2		EMG3		EMG 4		KIN 3			EMG1		EMG 2		EMG3		EMG 4		KIN 3
	First 5	0.160325		0.179205		0.262383		0.231901		0.0513889		First 5	0.075937		0.059232		0.035293		0.222678		0.0840278		First 5	0.078082		0.062057		0.036785		0.174537		0.138194
		0.092431		0.08083		0.131931		0.158485		0.0458333			0.105911		0.070658		0.084628		0.215035		0.124306			0.226407		0.229135		0.428329		0.328821		0.09375
		0.111798		0.083309		0.145195		0.185635		00,46,00			0.199239		0.164591		0.413637		0.333214		0.05625			0.154603		0.191322		0.284448		0.3008		0.09375
		0.090165		0.096273		0.154339		0.159731		0.0451389			0.049069		0.053137		0.036424		0.133478		0.0541667			0.096182		0.081616		0.152529		0.180836		0.0652778
		0.125228		0.107835		0.137535		0.210532		0.0465278			0.11202		0.113237		0.147847		0.21341		0.09375			0.159567		0.175341		0.185412		0.284444		0.0638889
	Average	0.115989		0.10949		0.166277		0.189257		0.0472222		Average	0.108435		0.092171		0.143566		0.223563		0.0825		Average	0.142968		0.147894		0.217501		0.253888		0.0909722
	Last 5	0.217814		0.189605		0.200013		0.591047		0.0715278		Last 5	0.07466		0.059116		0.046916		0.201279		0.0618056		Last 5	0.096112		0.086045		0.149613		0.289772		0.0458333
		0.236557		0.211214		0.122932		0.704203		0.0861111			0.22062		0.206032		0.330407		0.566201		0.0756944			0.111781		0.105249		0.107198		0.295525		0.04375
		0.429359		0.382282		0.346196		1.11632		0.0902778			0.240509		0.168404		0.193171		0.589328		0.05625			0.154814		0.118265		0.105744		0.343897		0.0631944
		0.186392		0.165841		0.151524		0.553354		0.0638889			0.570603		0.599518		0.392259		1.45064		0.0583333			0.501087		0.541677		0.234484		1.05672		0.0638889
		0.143881		0.115974		0.184931		0.331565		0.0659722			0.283113		0.30379		0.346622		0.85921		0.0506944			0.202445		0.157697		0.197618		0.538318		0.0486111
	Average	0.242801		0.212983		0.201119		0.659297		0.0755556		Average	0.277901		0.267372		0.261875		0.733333		0.0605556		Average	0.213248		0.201787		0.158931		0.504845		0.0530556

## Sheet: MG54
	Soft food 1											Soft food 2											Soft food 3
MG54	EMG1		EMG 2		EMG3		EMG 4		KIN 3			EMG1		EMG 2		EMG3		EMG 4		KIN 3			EMG1		EMG 2		EMG3		EMG 4		KIN 3
	First 5	0.918338		1.46697		0.077203		0.960532		0.0909722		First 5	1.11736		1.66819		0.127231		1.12274		0.113194		First 5	0.591503		0.929138		0.083268		0.665398		0.0736111
		0.723113		1.04941		0.141755		0.771041		0.0638889			0.698701		1.1262		0.11266		0.742557		0.0784722			0.548523		0.937042		0.138097		0.623615		0.075
		0.593192		0.902901		0.215913		0.585513		0.0819444			0.498075		0.809276		0.093338		0.65713		0.0722222			0.470704		0.771921		0.111224		0.54557		0.0951389
		0.653413		0.944995		0.210921		0.626654		0.0847222			0.944799		1.43487		0.136248		0.947873		0.0909722			0.402439		0.808611		0.195164		0.515818		0.0756944
		0.409284		0.848083		0.19595		0.495165		0.0868056			0.882484		1.30557		0.205137		0.869055		0.0909722			0.438193		0.675501		0.125248		0.484147		0.08125
	Average	0.659468		1.04247		0.168348		0.687781		0.0816667		Average	0.828283		1.26882		0.134923		0.867871		0.0891667		Average	0.490272		0.824443		0.1306		0.56691		0.0801389
	Last 5	0.435236		0.686904		0.181579		0.42971		0.0833333		Last 5	0.534793		0.845733		0.121611		0.555223		00,47,00		Last 5	0.315742		0.48086		0.071176		0.329537		00,47,00
		0.502312		0.805815		0.17196		0.479913		0.0729167			0.461153		0.708865		0.033624		0.500945		0.0465278			0.499328		0.794093		0.086468		0.508232		0.0756944
		0.542915		0.930372		0.289053		0.553685		0.0847222			0.352307		0.552083		0.028692		0.369399		00,41,00			0.424879		0.672284		0.088995		0.431306		0.075
		0.435236		0.686904		0.181579		0.42971		0.0833333			0.80616		1.24567		0.20483		0.828952		0.0479167			0.430378		0.72034		0.087209		0.519523		0.0638889
		0.502312		0.805815		0.17196		0.479913		0.0729167			0.97205		1.57443		0.12162		1.05665		00,49,00			0.438726		0.613573		0.095127		0.464873		00,46,00
	Average	0.483602		0.783162		0.199226		0.474586		0.0794444		Average	0.625293		0.985356		0.102075		0.662234		0.0472222		Average	0.421811		0.65623		0.085795		0.450694		0.0715278
	Hard food 1											Hard food 2											Hard food 3
	EMG1		EMG 2		EMG3		EMG 4		KIN 3			EMG1		EMG 2		EMG3		EMG 4		KIN 3			EMG1		EMG 2		EMG3		EMG 4		KIN 3
	First 5	0.507986		0.939472		0.119207		0.608844		0.0916667		First 5	0.568202		0.983398		0.052146		0.619776		0.104167		First 5	0.582182		0.969718		0.093327		0.596783		0.0986111
		0.57267		0.921266		0.10154		0.542055		0.0979167			0.441543		0.667876		0.108164		0.503789		0.0777778			0.5554		0.898466		0.106641		0.603947		0.120139
		0.616143		1.03155		0.106192		0.63877		0.0944444			0.452215		0.71591		0.080718		0.527036		0.0868056			0.342039		0.599963		0.129902		0.423052		0.108333
		0.417047		0.755771		0.112666		0.456465		0.0833333			0.61083		1.05757		0.118807		0.658999		0.08125			0.27509		0.564376		0.11396		0.360029		0.0888889
		0.409974		0.71034		0.101121		0.420765		0.0854167			0.550462		0.938091		0.074295		0.620191		0.0784722			0.356148		0.583549		0.090692		0.353789		0.0736111
	Average	0.504764		0.87168		0.108145		0.53338		0.0905556		Average	0.52465		0.872569		0.086826		0.585958		0.0856944		Average	0.422172		0.723214		0.106904		0.46752		0.0979167
	Last 5	0.341712		0.597631		0.083776		0.36475		0.0465278		Last 5	0.482036		0.808101		0.079246		0.590071		0.0722222		Last 5	0.288737		0.531256		0.091536		0.35859		0.0770833
		0.275337		0.532887		0.088111		0.348064		0.0465278			0.364347		0.674162		0.073526		0.45732		0.0784722			0.305423		0.488811		0.075971		0.278118		0.0659722
		0.265661		0.503187		0.05906		0.3449		0.0618056			0.226838		0.44472		0.064652		0.30407		0.0451389			0.271954		0.444019		0.071071		0.29378		0.0659722
		0.517142		0.959356		0.055644		0.671655		0.0923611			0.470754		0.812297		0.043764		0.553135		0.0673611			0.313481		0.49385		0.09142		0.303071		0.05625
		0.275408		0.453318		0.046235		0.269761		0.0555556			0.240965		0.54962		0.063475		0.340908		0.0493056			0.327628		0.530553		0.081874		0.316441		0.08125
	Average	0.335052		0.609276		0.0665652		0.399826		0.0605556		Average	0.356988		0.65778		0.0649326		0.449101		0.0625		Average	0.301445		0.497698		0.0823744		0.31		0.0693056

## Sheet: MG55
	Soft food 1											Soft food 2											Soft food 3
MG55	EMG1		EMG 2		EMG3		EMG 4		KIN 3			EMG1		EMG 2		EMG3		EMG 4		KIN 3			EMG1		EMG 2		EMG3		EMG 4		KIN 3
	First 5	0.206		0.167651		0.207458		0.159092		0.0625		First 5	0.15807		0.266243		0.200322		0.186905		0.075		First 5	0.132543		0.321233		0.166299		0.284748		0.0645833
		0.231444		0.223382		0.247079		0.212467		0.0777778			0.149242		0.325423		0.160432		0.175787		0.0923611			0.183223		0.410184		0.211868		0.245193		0.0951389
		0.193689		0.143837		0.224413		0.158254		0.0763889			0.173907		0.405932		0.16927		0.230776		0.0972222			0.151049		0.496639		0.24502		0.18775		0.075
		0.289389		0.151178		0.264679		0.204445		0.0881944			0.184528		0.434437		0.165829		0.219751		0.0944444			0.186937		0.46278		0.266939		0.320105		0.105556
		0.309324		0.177547		0.254403		0.198587		0.0826389			0.157441		0.344251		0.230425		0.281697		0.100694			0.115526		0.370462		0.161191		0.238234		0.0881944
	Average	0.245969		0.172719		0.239606		0.186569		0.0775		Average	0.164638		0.355257		0.185256		0.218983		0.0919444		Average	0.153856		0.41226		0.210263		0.255206		0.0856944
	Last 5	0.306491		0.166676		0.102469		0.332761		0.004883		Last 5	0.127164		0.235619		0.095415		0.231725		0.0875		Last 5	0.101405		0.247331		0.093661		0.228391		0.0930556
		0.281611		0.115214		0.091207		0.301487		0.004883			0.145056		0.290562		0.107679		0.345764		0.0951389			0.125561		0.311608		0.150302		0.311706		0.111806
		0.479355		0.161769		0.123364		0.417603		0.004883			0.229698		0.226206		0.157426		0.460936		0.0972222			0.167503		0.291783		0.114755		0.447878		0.1125
		0.217692		0.140032		0.150571		0.328773		0.004883			0.25847		0.382772		0.108962		0.576995		0.0729167			0.125561		0.311608		0.150302		0.311706		0.111806
		0.259525		0.090916		0.153139		0.198313		0.004883			0.160193		0.13207		0.107241		0.476914		0.0673611			0.167503		0.291783		0.114755		0.447878		0.1125
	Average	0.308935		0.134921		0.12415		0.315787		0.004883		Average	0.184116		0.253446		0.115345		0.418467		0.0840278		Average	0.137507		0.290823		0.124755		0.349512		0.108333
	Hard food 1											Hard food 2											Hard food 3
	EMG1		EMG 2		EMG3		EMG 4		KIN 3			EMG1		EMG 2		EMG3		EMG 4		KIN 3			EMG1		EMG 2		EMG3		EMG 4		KIN 3
	First 5	0.275179		0.591411		0.373091		0.260539		0.191667		First 5	0.291597		0.600952		0.448026		0.179651		0.152083		First 5	0.24511		0.572847		0.334449		0.231705		0.149306
		0.249783		0.494829		0.360384		0.222431		0.164583			0.197747		0.670729		0.495424		0.258978		0.104861			0.165912		0.506172		0.390721		0.183419		0.13125
		0.152635		0.542334		0.314168		0.182124		0.11875			0.123653		0.400657		0.331421		0.137465		0.0854167			0.061462		0.266815		0.227278		0.174182		0.0770833
		0.143476		0.598543		0.32008		0.156303		0.0881944			0.090718		0.422119		0.347507		0.25412		0.110417			0.22614		0.608345		0.367962		0.22481		0.164583
		0.126377		0.51119		0.320609		0.241969		0.152778			0.053887		0.334285		0.213819		0.165066		0.0888889			0.219638		0.579426		0.433494		0.20454		0.150694
	Average	0.18949		0.547661		0.337666		0.212673		0.143194		Average	0.15152		0.485748		0.367239		0.199056		0.108333		Average	0.183652		0.506721		0.350781		0.203731		0.134583
	Last 5	0.097039		0.5035		0.226716		0.223799		0.104167		Last 5	0.075049		0.256623		0.090707		0.225905		0.0951389		Last 5	0.08669		0.417634		0.165994		0.258399		0.104167
		0.118554		0.535111		0.206554		0.311716		0.0868056			0.094595		0.29175		0.10125		0.269695		0.109028			0.0971		0.361309		0.140096		0.314412		0.115278
		0.146232		0.248965		0.125187		0.393366		0.153472			0.083109		0.275997		0.115167		0.203197		0.075			0.117466		0.327281		0.14248		0.278501		0.129167
		0.101171		0.232682		0.087049		0.192036		0.0708333			0.068367		0.23724		0.090019		0.173526		0.0756944			0.192862		0.526006		0.125219		0.514498		0.111806
		0.136259		0.164948		0.061541		0.30381		0.0847222			0.160085		0.308182		0.060434		0.511897		0.117361			0.1548		0.289381		0.12766		0.456021		0.120139
	Average	0.119851		0.337041		0.141409		0.284945		0.1		Average	0.096241		0.273958		0.0915154		0.276844		0.0944444		Average	0.129784		0.384322		0.14029		0.364366		0.116111

## Sheet: MG56
	Soft food 1											Soft food 2											Soft food 3
MG56	EMG1		EMG 2		EMG3		EMG 4		KIN 3			EMG1		EMG 2		EMG3		EMG 4		KIN 3			EMG1		EMG 2		EMG3		EMG 4		KIN 3
	First 5	0.321399		0.310154		0.557511		0.414121		0.0770833		First 5	0.0686		0.188519		0.131496		0.327489		0.0576389		First 5	0.350233		0.272589		0.553426		0.319883		0.0881944
		0.431915		0.268505		0.697654		0.359471		0.0798611			0.331042		0.193978		0.402413		0.301235		0.0826389			0.401649		0.259152		0.761554		0.533987		0.116667
		0.371801		0.282491		0.757291		0.423974		0.0833333			0.386856		0.224239		0.469302		0.414992		0.0847222			0.407123		0.22115		0.660533		0.394703		0.101389
		0.355571		0.270113		0.586049		0.48606		0.0881944			0.367191		0.247873		0.614116		0.595188		0.0958333			0.277337		0.252211		0.697964		0.483227		0.0923611
		0.389979		0.376742		1.13461		0.543806		0.0513889			0.281652		0.164859		0.544147		0.52558		0.0888889			0.305928		0.191229		0.616761		0.313197		0.0770833
	Average	0.374133		0.301601		0.746623		0.445486		0.0759722		Average	0.287068		0.203894		0.432295		0.432897		0.0819444		Average	0.348454		0.239266		0.658048		0.408999		0.0951389
	Last 5	0.183925		0.265635		0.248919		1.26692		0.0534722		Last 5	0.101695		0.148974		0.665092		0.419469		0.0659722		Last 5	0.168077		0.208009		0.093811		0.966094		0.0958333
		0.056285		0.087018		0.047808		0.510612		00,49,00			0.195821		0.242517		0.236777		0.802306		0.0770833			0.232201		0.219843		0.55975		0.908915		0.0673611
		0.153541		0.172889		0.121985		0.739551		0.0659722			0.238961		0.239412		0.639134		0.967415		0.0625			0.05745		0.115954		0.051522		0.324693		0.04375
		0.11104		0.142861		0.101041		0.600581		0.0722222			0.362835		0.301549		1.30182		0.998013		0.0597222			0.071559		0.126585		0.091017		0.538799		0.0777778
		0.129837		0.175627		0.096022		0.894323		0.0631944			0.204084		0.19709		1.00684		0.446292		0.0493056			0.267353		0.247983		0.298657		0.762142		0.118056
	Average	0.126926		0.168806		0.123155		0.802396		0.0637153		Average	0.220679		0.225908		0.769933		0.726699		0.0629167		Average	0.159328		0.183675		0.218951		0.700129		0.0805556
	Hard food 1											Hard food 2											Hard food 3
	EMG1		EMG 2		EMG3		EMG 4		KIN 3			EMG1		EMG 2		EMG3		EMG 4		KIN 3			EMG1		EMG 2		EMG3		EMG 4		KIN 3
	First 5	0.451785		0.371205		0.681037		0.399947		0.124306		First 5	0.202182		0.338066		0.518381		0.406874		0.109028		First 5	0.188567		0.456315		0.531284		0.166425		0.075
		0.091125		0.119695		0.149647		0.399913		0.101389			0.18091		0.441777		0.751121		0.435237		0.102083			0.457161		0.30985		0.840346		0.718455		0.13125
		0.211243		0.42314		0.975464		0.270826		0.1			0.194414		0.464626		0.698716		0.299745		0.0923611			0.401293		0.23805		0.645245		0.409798		0.108333
		0.076929		0.136273		0.140953		0.299523		0.123611			0.188365		0.383078		0.577386		0.378916		0.107639			0.277109		0.126939		0.524948		0.282424		0.1
		0.208438		0.485902		0.663387		0.345281		0.120833			0.209291		0.417933		0.59019		0.39576		0.110417			0.239641		0.244817		0.580537		0.171904		0.0881944
	Average	0.207904		0.307243		0.522098		0.343098		0.114028		Average	0.195032		0.409096		0.627159		0.383306		0.104306		Average	0.312754		0.275194		0.624472		0.349801		0.100556
	Last 5	0.124087		0.162422		0.090372		0.744257		0.102083		Last 5	0.064604		0.115286		0.063395		0.437037		0.0715278		Last 5	0.137716		0.221877		0.229349		0.561278		0.109028
		0.179154		0.259371		0.846749		0.664778		0.0645833			0.118269		0.153234		0.307547		0.384687		0.1			0.100799		0.129575		0.063431		0.551962		0.0805556
		0.201583		0.296099		0.328147		0.880026		0.0972222			0.12026		0.149442		0.068128		0.765394		0.0958333			0.103064		0.199714		0.145591		0.357693		0.0652778
		0.106661		0.206562		0.288589		0.590007		0.0847222			0.126101		0.240228		0.277086		0.681188		0.0611111			0.077473		0.121389		0.085753		0.222145		0.0618056
		0.076644		0.156373		0.135596		0.478243		0.0805556			0.114841		0.164345		0.072599		0.675723		0.0909722			0.118656		0.235532		0.291428		0.554768		0.0777778
	Average	0.137626		0.216165		0.337891		0.671462		0.0858333		Average	0.108815		0.164507		0.157751		0.588806		0.0838889		Average	0.107542		0.181617		0.16311		0.449569		0.0788889

## Sheet: MG57
	Soft food 1											Soft food 2											Soft food 3
MG57	EMG1		EMG 2		EMG3		EMG 4		KIN 3			EMG1		EMG 2		EMG3		EMG 4		KIN 3			EMG1		EMG 2		EMG3		EMG 4		KIN 3
	First 5	0.247592		0.211178		0.063848		0.364631		0.0638889		First 5	0.337086		0.292154		0.12197		0.585358		0.0520833		First 5	0.162057		0.159654		0.059148		0.524374		0.0916667
		0.220195		0.174677		0.051403		0.259733		0.0451389			0.236965		0.211348		0.092005		0.431659		0.0673611			0.177085		0.161195		0.065443		0.583576		0.0590278
		0.314813		0.250866		0.093074		0.680543		0.100694			0.348887		0.311452		0.18972		0.369131		0.0694444			0.197124		0.206404		0.071744		0.367301		0.0715278
		0.227135		0.158317		0.063897		0.362344		0.0777778			0.387796		0.311526		0.201412		0.394584		0.0666667			0.574552		0.485202		0.289314		0.71595		0.0659722
		0.318689		0.277486		0.120861		0.363712		0.0944444			0.310075		0.258025		0.129202		0.501514		0.0673611			0.31542		0.249919		0.132034		0.399938		0.0722222
	Average	0.265685		0.214505		0.0786166		0.406193		0.0763889		Average	0.324162		0.276901		0.146862		0.456449		0.0645833		Average	0.285248		0.252475		0.123537		0.518228		0.0720833
	Last 5	0.277448		0.216379		0.089369		0.642818		0.075		Last 5	0.216523		0.187886		0.122236		0.47183		00,40,00		Last 5	0.26806		0.253283		0.116128		1.28969		0.0715278
		0.369104		0.281468		0.157564		0.559536		0.0826389			0.112501		0.088226		0.034373		0.228395		00,57,00			0.338024		0.278011		0.127583		0.803191		00,40,00
		0.402226		0.276297		0.159938		0.629792		0.0965278			0.103785		0.097327		0.034497		0.251762		00,44,00			0.31416		0.275765		0.117862		0.749566		0.0694444
		0.30389		0.238651		0.104522		0.716832		0.0722222			0.219235		0.220257		0.104344		0.525992		0.0416667			0.098415		0.107655		0.046031		0.320431		00,56,00
		0.494482		0.322445		0.185732		0.591963		0.0923611			0.186756		0.148438		0.123232		0.432961		00,56,00			0.259647		0.259749		0.108433		0.78755		0.0625
	Average	0.36943		0.267048		0.139425		0.628188		0.08375		Average	0.16776		0.148427		0.0837364		0.382188		0.0416667		Average	0.255661		0.234893		0.103207		0.790086		0.0678241
	Hard food 1											Hard food 2											Hard food 3
	EMG1		EMG 2		EMG3		EMG 4		KIN 3			EMG1		EMG 2		EMG3		EMG 4		KIN 3			EMG1		EMG 2		EMG3		EMG 4		KIN 3
	First 5	0.226775		0.247436		0.118347		0.383228		00,45,00		First 5	0.245228		0.249854		0.102462		0.522858		0.0486111		First 5	0.221216		0.263619		0.131085		0.838037		0.0986111
		0.173336		0.219699		0.166675		0.368762		00,43,00			0.293846		0.261467		0.14832		0.616646		0.0576389			0.216672		0.185717		0.10311		0.243919		0.0527778
		0.534873		0.41773		0.175712		0.755725		0.0583333			0.260063		0.166586		0.128246		0.429202		0.0715278			0.286471		0.212014		0.178965		0.340552		0.0534722
		0.378038		0.371445		0.180661		0.496109		0.0555556			0.229538		0.145727		0.103165		0.28757		0.0590278			0.315013		0.213224		0.220184		0.458807		0.0506944
		0.420256		0.373985		0.202356		0.524296		0.0465278			0.269382		0.221428		0.150617		0.40012		0.0652778			0.317752		0.247895		0.170682		0.367514		0.0763889
	Average	0.346656		0.326059		0.16875		0.505624		0.0534722		Average	0.259611		0.209012		0.126562		0.451279		0.0604167		Average	0.271425		0.224494		0.160805		0.449766		0.0663889
	Last 5	0.277721		0.181072		0.16154		0.430115		0.04375		Last 5	0.376946		0.273418		0.208164		0.577382		0.0625		Last 5	0.15235		0.11458		0.094021		0.226109		0.0423611
		0.278502		0.21992		0.192898		0.421839		0.04375			0.315862		0.222289		0.190247		0.516619		0.0597222			0.258503		0.239241		0.138427		0.578293		0.0541667
		0.29189		0.222681		0.192241		0.431321		00,53,00			0.304005		0.228064		0.188914		0.503644		0.0722222			0.19521		0.14193		0.114324		0.317501		0.04375
		0.339907		0.272171		0.178813		0.353926		00,27,00			0.226399		0.167115		0.115412		0.391517		0.0416667			0.185444		0.157324		0.108229		0.470046		00,58,00
		0.135509		0.117933		0.043278		0.148358		00,25,00			0.315513		0.234405		0.164733		0.291142		00,56,00			0.15235		0.11458		0.094021		0.226109		0.0423611
	Average	0.264706		0.202755		0.153754		0.357112		0.04375		Average	0.307745		0.225058		0.173494		0.456061		0.0590278		Average	0.188771		0.153531		0.109804		0.363612		0.0456597

## Sheet: MG58
	Soft food 1											Soft food 2											Soft food 3
MG58	EMG1		EMG 2		EMG3		EMG 4		KIN 3			EMG1		EMG 2		EMG3		EMG 4		KIN 3			EMG1		EMG 2		EMG3		EMG 4		KIN 3
	First 5	0.033277		0.044342		0.063238		0.114295		00:26:00		First 5											First 5
		0.311312		0.438398		0.367758		0.286414		00:32:00
		0.518353		0.53627		0.596394		0.37156		00:33:00
		0.387105		0.467266		0.442819		0.318157		00:40:00
		0.474492		0.360544		0.466015		0.329186		00:38:00
	Average	0.344908		0.369364		0.387245		0.283922		0.0234722		Average											Average
	Last 5	0.505845		0.560267		0.500845		0.361792		00:39:00		Last 5											Last 5
		0.440545		0.41362		0.521746		0.358165		00:36:00
		0.439117		0.217877		0.492457		0.253602		00:32:00
		0.349777		0.28253		0.480345		0.334889		00:32:00
		0.111233		0.036059		0.041633		0.238877		00:31:00
	Average	0.369303		0.302071		0.407405		0.309465		0.0236111		Average											Average
	Hard food 1											Hard food 2											Hard food 3
	EMG1		EMG 2		EMG3		EMG 4		KIN 3			EMG1		EMG 2		EMG3		EMG 4		KIN 3			EMG1		EMG 2		EMG3		EMG 4		KIN 3
	First 5	0.173154		0.837798		0.498183		0.297511		00:52:00		First 5	0.420062		0.421273		0.676743		0.44413		00:41:00		First 5	0.128161		0.775816		0.507826		0.215167		00:40:00
		0.155274		0.793961		0.71599		0.284754		00:48:00			0.486406		0.620032		0.870809		0.367243		00:44:00			0.146825		0.777608		0.554038		0.233414		00:46:00
		0.203031		1.0209		0.656121		0.385022		00:42:00			0.469586		0.720782		0.770471		0.285934		00:39:00			0.24192		1.15867		0.57014		0.238582		00:39:00
		0.134327		0.787676		0.639225		0.346436		00:38:00			0.506214		0.420156		0.63744		0.222106		00:41:00			0.185145		0.790955		0.517083		0.196044		00:37:00
		0.167982		0.778943		0.45527		0.289923		00:44:00			0.328976		0.1971		0.521031		0.206674		00:34:00			0.093999		0.627387		0.441889		0.245864		00:44:00
	Average	0.166754		0.843855		0.592958		0.320729		0.0311111		Average	0.442249		0.475869		0.695299		0.305217		0.0276389		Average	0.15921		0.826087		0.518195		0.225814		0.0286111
	Last 5	0.252694		0.137397		0.276793		0.235035		00:35:00		Last 5	0.580813		0.32571		0.921137		0.311072		00:28:00		Last 5	0.111031		0.485025		0.404867		0.209462		00:32:00
		0.215465		0.101955		0.327558		0.234419		00:51:00			0.192889		0.108417		0.343305		0.157969		00:38:00			0.108166		0.531144		0.374302		0.322142		00:44:00
		0.240495		0.116208		0.395798		0.163158		00:36:00			0.239362		0.185458		0.357219		0.164073		00:28:00			0.078131		0.443535		0.316397		0.153484		00:31:00
		0.208505		0.073663		0.358721		0.193133		00:32:00			0.124296		0.6318		0.380797		0.156017		00:34:00			0.165712		0.908637		0.493459		0.186261		00:43:00
		0.2417		0.110727		0.392253		0.24856		00:43:00			0.204914		0.224598		0.353948		0.126888		00:33:00			0.079954		0.67673		0.401459		0.139629		00:41:00
	Average	0.231772		0.10799		0.350225		0.214861		0.0273611		Average	0.268455		0.295197		0.471281		0.183204		0.0223611		Average	0.108599		0.609014		0.398097		0.202196		0.0265278

## Sheet: MG59
	Soft food 1											Soft food 2											Soft food 3
MG59	EMG1		EMG 2		EMG3		EMG 4		KIN 3			EMG1		EMG 2		EMG3		EMG 4		KIN 3			EMG1		EMG 2		EMG3		EMG 4		KIN 3
	First 5	0.279086		0.238781		0.177243		0.26976		0.0576389		First 5	0.25842		0.267693		0.135329		0.21098		0.0506944		First 5	0.177453		0.260626		0.18562		0.315727		0.0611111
		0.408434		0.314426		0.218747		0.347664		0.0486111			0.261854		0.279713		0.133269		0.203424		00,51,00			0.180851		0.221416		0.164809		0.189317		0.0569444
		0.384808		0.306835		0.253588		0.348977		0.0722222			0.171769		0.30944		0.207709		0.170354		00,50,00			0.173999		0.281813		0.23618		0.187164		0.0493056
		0.272063		0.259876		0.215209		0.249046		0.05625			0.233186		0.316831		0.212125		0.204391		0.0534722			0.295927		0.427379		0.300513		0.263587		0.0604167
		0.415813		0.526579		0.342333		0.36339		0.06875			0.171295		0.21408		0.154215		0.137617		00,52,00			0.209286		0.407978		0.29664		0.147413		0.0520833
	Average	0.352041		0.329299		0.241424		0.315767		0.0606944		Average	0.219305		0.277551		0.168529		0.185353		0.0520833		Average	0.207503		0.319842		0.236752		0.220642		0.0559722
	Last 5	0.352067		0.804689		0.421065		0.320836		0.0625		Last 5	0.183382		0.273129		0.218999		0.15565		00,59,00		Last 5	0.370316		0.643554		0.33747		0.296429		0.0743056
		0.31667		0.565918		0.315128		0.457842		0.0701389			0.21648		0.497301		0.285986		0.255684		0.0680556			0.424145		0.874107		0.382771		0.488212		0.0701389
		0.584438		1.1662		0.434625		0.938893		0.0638889			0.27618		0.524039		0.259713		0.234833		0.0625			0.234655		0.447606		0.243376		0.20557		0.0493056
		0.284373		0.532729		0.290112		0.390755		0.0659722			0.470088		0.821648		0.307604		0.668467		0.0659722			0.222973		0.48369		0.284732		0.480212		0.0625
		0.217139		0.337677		0.34665		0.258203		0.05625			0.511953		0.858109		0.350818		0.769729		0.0875			0.232509		0.46352		0.210869		0.67143		0.0541667
	Average	0.350937		0.681443		0.361516		0.473306		0.06375		Average	0.331617		0.594845		0.284624		0.416873		0.0710069		Average	0.29692		0.582495		0.291844		0.428371		0.0620833
	Hard food 1											Hard food 2											Hard food 3
	EMG1		EMG 2		EMG3		EMG 4		KIN 3			EMG1		EMG 2		EMG3		EMG 4		KIN 3			EMG1		EMG 2		EMG3		EMG 4		KIN 3
	First 5	0.3087		0.49943		0.296681		0.294349		0.0791667		First 5	0.186407		0.436486		0.264105		0.188048		0.0569444		First 5	0.230306		0.207095		0.265711		0.203596		0.0597222
		0.268373		0.569215		0.349148		0.270322		0.075			0.202431		0.552556		0.273958		0.155777		0.0416667			0.320098		0.491955		0.307711		0.354911		0.0875
		0.176839		0.393446		0.259127		0.199901		0.0611111			0.337511		0.365505		0.352382		0.292262		0.0895833			0.297457		0.240674		0.256048		0.174132		0.05
		0.236869		0.473483		0.350103		0.238672		0.0659722			0.434559		0.372415		0.364132		0.171549		0.0534722			0.299266		0.243716		0.274299		0.144775		0.0513889
		0.210861		0.629189		0.330914		0.191767		0.0541667			0.224883		0.157329		0.220313		0.117495		0.0576389			0.239747		0.17187		0.199276		0.104144		0.0451389
	Average	0.240328		0.512953		0.317195		0.239002		0.0670833		Average	0.277158		0.376858		0.294978		0.185026		0.0598611		Average	0.277375		0.271062		0.260609		0.196312		0.05875
	Last 5	0.281716		0.225356		0.250225		0.187827		0.0694444		Last 5	0.209293		0.443574		0.265629		0.157424		0.0652778		Last 5	0.177018		0.460483		0.260527		0.219854		0.0666667
		0.509027		0.696928		0.38751		0.440985		0.0694444			0.176769		0.362387		0.191165		0.154579		0.0611111			0.205371		0.356597		0.219964		0.168631		0.0597222
		0.292445		0.352153		0.224812		0.251602		0.0541667			0.187846		0.395161		0.190067		0.195347		0.0576389			0.179895		0.39594		0.210211		0.185572		0.0722222
		0.078525		0.135447		0.04939		0.147751		0.0652778			0.171019		0.349366		0.167079		0.166866		0.0472222			0.148955		0.396581		0.175059		0.165804		0.0680556
		0.439005		0.468928		0.348331		0.445704		0.0888889			0.178444		0.372248		0.238799		0.217482		0.0625			0.18614		0.410272		0.174061		0.151469		0.0534722
	Average	0.320144		0.375762		0.252054		0.294774		0.0694444		Average	0.184674		0.384547		0.210548		0.17834		0.05875		Average	0.179476		0.403975		0.207964		0.178266		0.0640278

## Sheet: MG01
	Soft food 1											Soft food 2											Soft food 3	UDGÅR
MG01	EMG1		EMG 2		EMG3		EMG 4		KIN 3			EMG1		EMG 2		EMG3		EMG 4		KIN 3			EMG1		EMG 2		EMG3		EMG 4		KIN 3
	First 5	0.070021		0.115739		0.03136		0.04418		00:55:00		First 5	0.119392		0.119392		0.058902		0.098532		0.075		First 5	0.088607		0.082525		0.054486		0.052497		0.0888889
		0.100208		0.108545		0.040148		0.070299		0.0625			0.12215		0.12215		0.092058		0.149844		0.0944444			0.120043		0.151087		0.037487		0.10866		0.0736111
		0.088517		0.133631		0.040241		0.080237		0.0569444			0.108264		0.108264		0.057379		0.164979		0.09375			0.086788		0.114061		0.032509		0.069626		0.0805556
		0.122124		0.133152		0.042772		0.109583		0.0854167			0.077405		0.077405		0.056097		0.126204		0.0916667			0.120361		0.170661		0.066186		0.102709		0.0951389
		0.081469		0.148522		0.054385		0.103384		0.0666667			0.111003		0.111003		0.083814		0.14405		0.08125
	Average	0.0924678		0.127918		0.0417812		0.0815366		0.0619444		Average	0.107643		0.107643		0.06965		0.136722		0.0872222		Average
	Last 5	0.070021		0.070021		0.070021		0.070021		0.070021		Last 5	0.136215		0.108264		0.057379		0.164979		0.09375		Last 5
		0.100208		0.100208		0.100208		0.100208		0.100208			0.089035		0.077405		0.056097		0.126204		0.0916667
		0.088517		0.088517		0.088517		0.088517		0.088517			0.103591		0.111003		0.083814		0.14405		0.08125
		0.122124		0.122124		0.122124		0.122124		0.122124			0.096778		0.128718		0.07928		0.150109		0.0791667
		0.081469		0.081469		0.081469		0.081469		0.081469			0.123555		0.11404		0.07807		0.184287		0.0909722
	Average	0.0924678		0.0924678		0.0924678		0.0924678		0.0924678		Average	0.109835		0.107886		0.070928		0.153926		0.0873611		Average
	Hard food 1											Hard food 2											Hard food 3
	EMG1		EMG 2		EMG3		EMG 4		KIN 3			EMG1		EMG 2		EMG3		EMG 4		KIN 3			EMG1		EMG 2		EMG3		EMG 4		KIN 3
	First 5	0.178799		0.141746		0.175119		0.11748		0.08125		First 5	0.136114		0.294194		0.15843		0.076075		0.0777778		First 5	0.183686		0.225321		0.229044		0.176549		0.109028
		0.183064		0.136828		0.164431		0.212934		0.124306			0.149403		0.312829		0.176		0.113785		0.0805556			0.153658		0.159994		0.144772		0.116167		0.0833333
		0.22021		0.214843		0.228651		0.209558		0.113889			0.15698		0.335614		0.183858		0.176997		0.0840278			0.154831		0.140782		0.123602		0.228196		0.116667
		0.213539		0.234353		0.226046		0.159094		0.0909722			0.137434		0.329621		0.223279		0.133805		0.0819444			0.180435		0.223711		0.223364		0.097876		0.0770833
		0.197978		0.197558		0.191517		0.1715		0.0979167			0.260261		0.32765		0.268125		0.17882		0.102778			0.165281		0.228551		0.205475		0.127573		0.0652778
	Average	0.198718		0.185066		0.197153		0.174113		0.101667		Average	0.168038		0.319982		0.201938		0.135896		0.0854167		Average	0.167578		0.195672		0.185251		0.149272		0.0902778
	Last 5	0.144401		0.10529		0.116513		0.149482		0.06875		Last 5	0.136959		0.217831		0.158032		0.148344		0.0826389		Last 5	0.169522		0.191252		0.169447		0.137059		0.0847222
		0.160342		0.186006		0.154556		0.190413		0.0729167			0.195242		0.233085		0.224427		0.15232		0.0791667			0.140647		0.090414		0.096501		0.117169		0.0715278
		0.139863		0.119652		0.099654		0.175778		0.0916667			0.147204		0.146511		0.136397		0.114194		0.0625			0.139051		0.078511		0.072698		0.142971		0.0805556
		0.18345		0.131616		0.128469		0.191654		0.0916667			0.186362		0.345519		0.313135		0.153439		0.0909722			0.13682		0.0583		0.052763		0.128259		0.0715278
		0.112112		0.046746		0.042812		0.162949		0.06875			0.231237		0.287503		0.236012		0.168437		0.0895833			0.133703		0.24532		0.208795		0.112237		0.0604167
	Average	0.148034		0.117862		0.108401		0.174055		0.07875		Average	0.179401		0.24609		0.213601		0.147347		0.0809722		Average	0.143949		0.132759		0.120041		0.127539		0.07375

[truncated: 3 more sheets: MG02, MG04, MG05]
