# Supplementary material for: Oral function in patients with myasthenia gravis
Source: PeerJ. 2021 Jun 29;9:e11680. doi: 10.7717/peerj.11680 (PMC8253106; doi:10.7717/peerj.11680)
Supplement: Supplemental Information 4 — Patient and control data of masticatory cycles and peak bite force values. [file peerj-09-11680-s004.xlsx]

## Sheet: Sheet1
		Soft food mastication			Soft food, mean	Mastication of hard food			Hard food mean
12	ID	1	2	3		1	2	3				Soft food mastication			Soft food, mean	Mastication of hard food			Hard food mean
Patients	MG51	22	26	22	23.3333	47	57	53	52.3333		12 patients	1	2	3		1	2	3
	MG52	25	33	16	24.6667	80	68	67	71.6667		Average	19.5385	20.7692	19.5385	21.4444	43.2308	45.4615	43.4615	47.5556
	MG54	11	14	12	12.3333	34	34	29	32.3333		SD	11.3256	13.7668	16.3586	12.7059	23.6613	24.3503	21.5314	19.7363
	MG55	15	12	11	12.6667	23	29	28	26.6667		9 controls
	MG56	20	25	21	22	41	46	45	44		Averages	15.375	14.5556	13.6667	14.5324	38.1111	39.4444	39.4444	39
	MG57	12	24	17	17.6667	40	51	48	46.3333		SD	5.75543	4.79873	3.16228	3.75072	11.7733	11.6309	11.5229	10.7186
SLETTES?	MG58	10	5	6	7	26	21	20	22.3333		P	0.28	0.15	0.22	0.07	0.5	0.45	0.58	0.2
	MG59	16	13	12	13.6667	26	27	29	27.3333
	MG01	23	16	22	20.3333	31	32	39	34
	MG02	18	16	11	15	70	85	60	71.6667
	MG04	43	55	67	55	71	82	80	77.6667
	MG05	38	29	34	33.6667	72	57	64	64.3333			Soft food masticaiton	Hard food mastication	SE
	Average	19.5385	20.7692	19.5385	21.4444	43.2308	45.4615	43.4615	47.5556		Patients
	SD	11.3256	13.7668	16.3586	12.7059	23.6613	24.3503	21.5314	19.7363		Controls
	Mean+2*SD	42.1897	48.3029	52.2556	46.8563	90.5534	94.1621	86.5244
Controls	CS01	11	15	10	12	52	60	63	58.3333
9	CS02	18	21	17	18.6667	44	39	27	36.6667
	CS03	13	18	16	15.6667	25	27	31	27.6667
	CS04	27	15	14	18.6667	40	42	48	43.3333
	CS52		12	15	13.5	27	38	40	35
	CS53	14	14	15	14.3333	51	49	44	48
	CS54	8	6	10	8	19	24	27	23.3333
	CS55	14	10	9	11	45	47	41	44.3333
	CS56	18	20	17	18.3333	40	29	34	34.3333
	Average	15.375	14.5556	13.6667	14.5324	38.1111	39.4444	39.4444	39
	SD	5.75543	4.79873	3.16228	3.75072	11.7733	11.6309	11.5229	10.7186

## Sheet: Sheet2
		ID	Max bite force 1	Max bite force 2	Max bite force 3	Max bite force 4	Mean
13	Patients	MG51	10.07	19.84	12.32	9.78	13.0025
		MG52	13.38	11.14	24.72	16.61	16.4625			Max bite force 1	Max bite force 2	Max bite force 3	Max bite force 4	Mean
		MG53	28.23	29.01	22.49	27.75	26.87		13 Patients	20.81	23.55	22.02	23.2	22.4
		MG54	39.17	45.32	38.1	38	40.1475		SD	11.66	16.43	14.84	17.99	14.5
		MG55	22.67	28.52	22.38	34.97	27.135		11 Controls	25.94	29.27	25.67	28.28	27.28
		MG56	28.53	16.42	17.59	16.42	19.74		SD	10.5	9.5	12.6	8.6	9.3
		MG57	1.48	2.75	3.14	2.45	2.455		P værdi	0.26	0.28	0.5	0.36	0.32
	SLETTES?	MG58	26.18	31.65	41.52	51.18	37.6325
		MG59	20	20	16	7	15.75
		MG01	35.17	58.89	54.02	55.68	50.94
		MG02	9.29	6.75	6.65	6.64	7.3325
		MG03	29.41	31.85	20.32	31.16	28.185
		MG05	7	4	7	4	5.5
		Average	20.8138	23.5492	22.0192	23.2031	22.3963
		SD	11.6637	16.4321	14.8369	17.9927	14.4992
		Mean+2*SD	44.1412	56.4134	51.693	59.1884	51.3947
11	Controls	CS01	31.75	34.39	28.33	33.77	32.06
		CS02	32	32	28	33	31.25
		CS03	23	32	32	35	30.5
		CS04	16	24	28	32	25
		CS51	20.42	22.28	3.33	29.2	18.8075
		CS52	41.13	42.3	41.42	32.14	39.2475
		CS53	17	22	32	28	24.75
		CS54	27	24	20	21	23
		CS55	27	24	20	21	23
		CS57	42	48	43	38	42.75
		CS58	8	17	6	8	9.75
		Average	25.9364	29.27	25.6436	28.2827	27.2832
		SD	10.4932	9.47258	12.6362	8.59647	9.26736

## Sheet: Number of cycles
		Soft food mastication mean	Mastication of hard food
12	ID
Patients	MG51	23.3333	52.3333
df:11, t'2,20	MG52	24.6667	71.6667
	MG54	12.3333	32.3333			Soft food mastication	Hard food mastication
	MG55	12.6667	26.6667		Patients	21.44	47.56
	MG56	22	44		Controls	14.53	39
	MG57	17.6667	46.3333
	MG58	7	22.3333
	MG59	13.6667	27.3333
	MG01	20.3333	34
	MG02	15	71.6667
	MG04	55	77.6667											SE*t'
	MG05	33.6667	64.3333									Patients (soft food)	21.44	8.07
	Average	21.4444	47.5556									Controls (soft food)	14.53	3.06
	SD	12.7059	19.7363									Patients (hard food)	47.56	12.53
	SE	3.66789	5.69738									Controls (hard food)	39	8.75
	-	13.3751	35.0213
	+	29.5138	60.0898
Controls	CS01	12	58.3333
df: 8, t'2,31	CS02	18.6667	36.6667
	CS03	15.6667	27.6667
	CS04	18.6667	43.3333
	CS52	13.5	35
	CS53	14.3333	48
	CS54	8	23.3333
	CS55	11	44.3333
	CS56	18.3333	34.3333
	Average	14.5324	39
	SD	3.75072	10.7186
	SE	1.32608	3.78961
	-	11.4692	30.246
	+	17.5957	47.754
	P værdi	0.0940478	0.219846			Soft food	Hard food	Soft food SE	Hard food SE
					Patients	21,44 (13.38;29,51)	47,56 (35,02;60,09)	8.06936	12.5342
					Controls	14,53 (11,47; 17,60)	39,00 (30,25; 47,75)	3.06324	8.75399
